# Supplementary material for: Evidence-Based Review on Symptomatic Management of Huntington’s Disease
Source: PubMed Central journal article supplement — J Mov Disord. 2024 Aug 9;17(4):369–86. doi: 10.14802/jmd.24140 (PMC11540544; doi:10.14802/jmd.24140), 2024-08-09
Supplement: jmd-24140-Supplementary-Fig-1.pdf [file jmd-24140-Supplementary-Fig-1.pdf]

**Supplementary Figure 1. Responses to a survey conducted among the movement disorder specialists in South Korea regarding the clinical unmet need in managing patients with Huntington's disease (HD).**

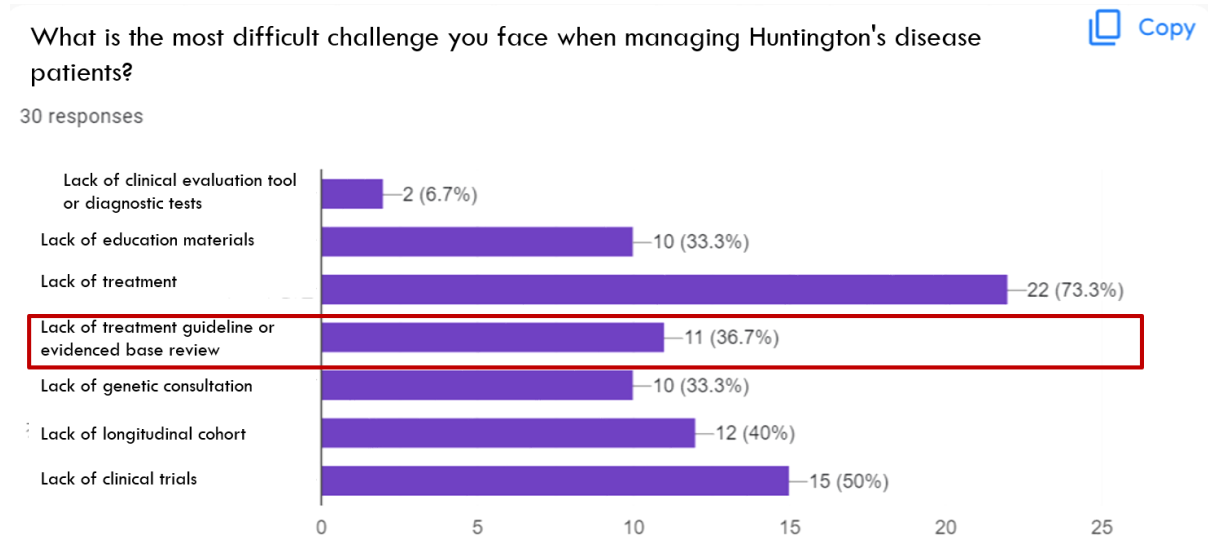

This figure represents the results of a survey conducted among the movement disorder specialists in South Korea (total n = 31) regarding the management of Huntington's disease patients in 2022. The survey question posed was, "What is the most difficult challenge you face when managing Huntington's disease patients?" A significant portion of the respondents (36.7%, 11/30) stated that a lack of treatment guidelines and appropriate evidence-based reviews was their primary challenge (red box).
