# Supplementary material for: Evidence-Based Review on Symptomatic Management of Huntington’s Disease
Source: PubMed Central journal article supplement — J Mov Disord. 2024 Aug 9;17(4):369–86. doi: 10.14802/jmd.24140 (PMC11540544; doi:10.14802/jmd.24140), 2024-08-09
Supplement: jmd-24140-Supplementary-Fig-2.pdf [file jmd-24140-Supplementary-Fig-2.pdf]

## Supplementary Figure 2. Drugs reviewed that targeted chorea for HD in this study

| Interventions               | I | II | III | IV | Level          |
|-----------------------------|---|----|-----|----|----------------|
| ethyl-eicosapentaenoic acid | 3 | 1  | 0   | 0  | A (No benefit) |
| latrepirdine*               | 2 | 0  | 0   | 0  | A (No benefit) |
| deutetrabenazine*           | 1 | 0  | 0   | 1  | B (Effective)  |
| valbenazine*                | 1 | 0  | 0   | 0  | B (Effective)  |
| tetrabenazine               | 1 | 1  | 0   | 3  | B (Effective)  |
| physical therapy            | 0 | 3  | 3   | 2  | C (Effective)  |
| coenzyme Q10                | 1 | 1  | 0   | 0  | B (no benefit) |
| creatine                    | 1 | 2  | 1   | 2  | B (no benefit) |
| pepinemab*                  | 1 | 0  | 0   | 0  | B (no benefit) |
| PBT2*                       | 1 | 0  | 0   | 0  | B (no benefit) |
| apomorphine*                | 0 | 1  | 1   | 0  | C (Effective)  |
| SBT-020*                    | 0 | 1  | 0   | 0  | C (no benefit) |
| selisstat*                  | 0 | 1  | 0   | 0  | C (no benefit) |
| (-)-OSU6162*                | 0 | 1  | 0   | 0  | C (no benefit) |
| AFQ056 (mGluR5 antagonist)* | 0 | 1  | 0   | 0  | C (no benefit) |
| atomoxetine                 | 0 | 1  | 0   | 0  | C (no benefit) |
| bupropion                   | 0 | 1  | 0   | 0  | C (no benefit) |
| cannabidiol oral spray      | 0 | 1  | 0   | 0  | C (no benefit) |
| citalopram                  | 0 | 1  | 0   | 0  | C (no benefit) |
| donepezil                   | 0 | 1  | 0   | 1  | C (no benefit) |
| fluoxetine                  | 0 | 1  | 0   | 0  | C (no benefit) |
| lamotrigine                 | 0 | 1  | 0   | 0  | C (no benefit) |
| nabilone*                   | 0 | 1  | 0   | 0  | C (no benefit) |
| OPC-14117*                  | 0 | 1  | 0   | 0  | C (no benefit) |

| Interventions                           | I | II | III | IV | Level           |
|-----------------------------------------|---|----|-----|----|-----------------|
| aripiprazole                            | 0 | 0  | 0   | 1  | U               |
| deep brain stimulation                  | 0 | 0  | 0   | 3  | U               |
| Diet intervention                       | 0 | 0  | 0   | 2  | U               |
| fetal transplantation*                  | 0 | 0  | 2   | 5  | U               |
| gene therapy (CNTF)*                    | 0 | 0  | 0   | 1  | U               |
| idebenone                               | 0 | 1  | 0   | 0  | U               |
| ketamine                                | 0 | 0  | 0   | 1  | U               |
| levitracetam                            | 0 | 0  | 1   | 0  | U               |
| memantine                               | 0 | 0  | 0   | 2  | U               |
| minocycline                             | 0 | 2  | 0   | 3  | U               |
| Nestacell-HD (allogeneic cell therapy)* | 0 | 0  | 0   | 1  | U               |
| nilotinib                               | 0 | 0  | 0   | 1  | U               |
| olanzapine                              | 0 | 0  | 0   | 3  | U               |
| Pallidothalamic tractography            | 0 | 0  | 0   | 1  | U               |
| proglumide                              | 0 | 0  | 0   | 1  | U               |
| Rilmenidine*                            | 0 | 0  | 0   | 1  | U               |
| Riluzole                                | 1 | 1  | 0   | 2  | U               |
| Risperidone                             | 0 | 0  | 0   | 1  | U               |
| TMS                                     | 0 | 0  | 0   | 1  | U               |
| triheptanoin*                           | 0 | 0  | 0   | 1  | U               |
| valproic acid                           | 0 | 0  | 0   | 1  | U               |
| remacemide*                             | 0 | 2  | 0   | 0  | U (conflicting) |
| rivastigmine                            | 0 | 1  | 1   | 0  | U (conflicting) |
| amantadine                              | 0 | 4  | 0   | 1  | U (conflicting) |
| clozapine                               | 0 | 1  | 0   | 1  | U (conflicting) |
| pridopidine*                            | 3 | 1  | 1   | 3  | U (conflicting) |
| IONIS-HTTRx*                            | 1 | 1  | 0   | 0  | U (Conflicting) |
| cysteamine                              | 1 | 0  | 0   | 2  | U (conflicting) |

\* This medication/intervention is not available in South Korea as of Jul. 2024
