# Supplementary material for: Evidence-Based Review on Symptomatic Management of Huntington’s Disease
Source: PubMed Central journal article supplement — J Mov Disord. 2024 Aug 9;17(4):369–86. doi: 10.14802/jmd.24140 (PMC11540544; doi:10.14802/jmd.24140), 2024-08-09
Supplement: jmd-24140-Supplementary-Fig-3.pdf [file jmd-24140-Supplementary-Fig-3.pdf]

### Supplementary Figure 3. PRISMA flow diagram of studies targeting dystonia in HD and drugs reviewed in this study

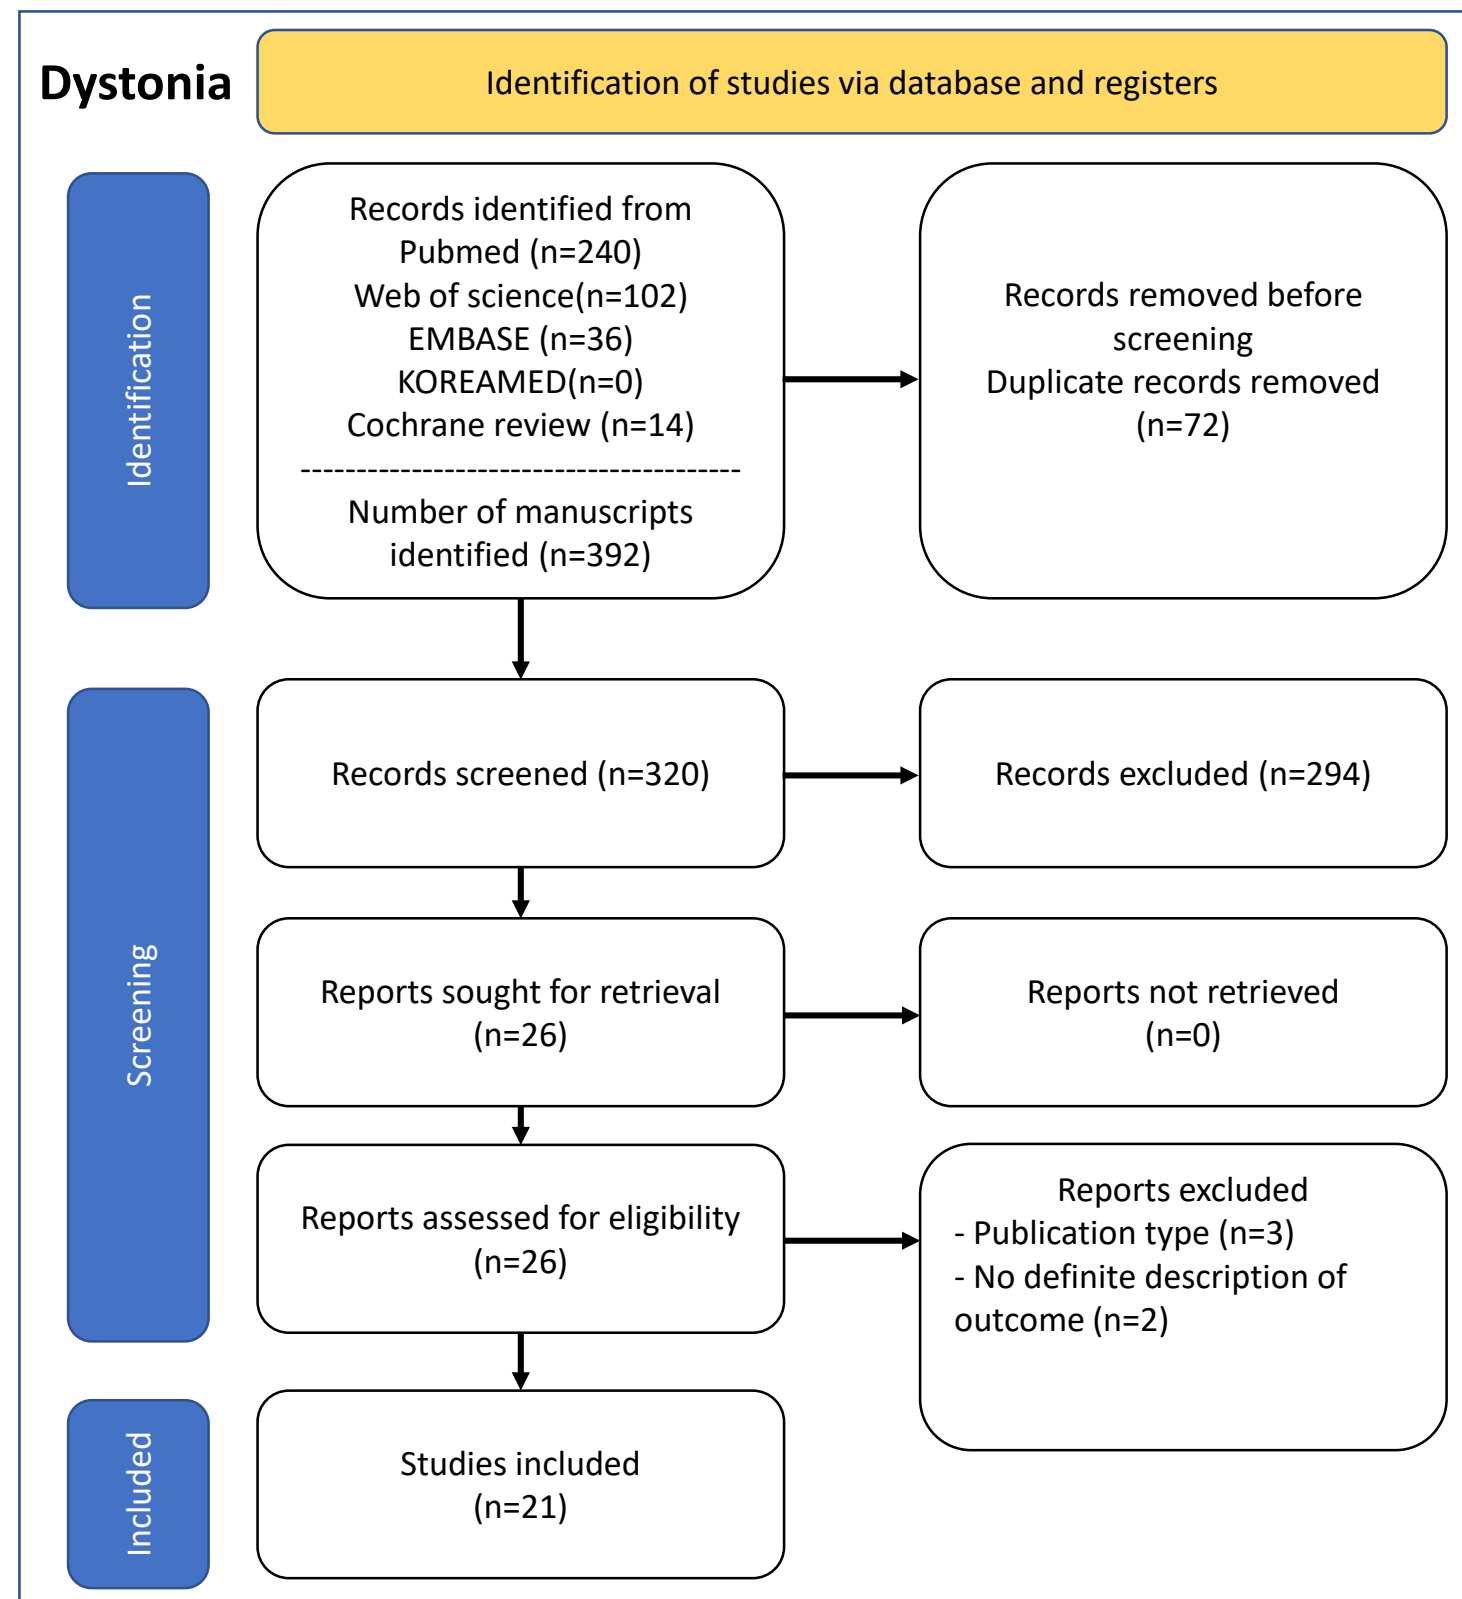

| Treatment                             | Class | Number of manuscript | Level           |
|---------------------------------------|-------|----------------------|-----------------|
| Pridopidine*                          | II    | 2                    | U (conflicting) |
| Deutetrabenazine*                     | II    | 1                    | C (effective)   |
| Riluzole                              | II    | 1                    | C (no benefit)  |
|                                       | IV    | 1                    |                 |
| Fluoxetine                            | II    | 1                    | C (no benefit)  |
| Minocycline                           | II    | 1                    | C (no benefit)  |
| Ethyl-Eicosapentaenoic acid           | II    | 1                    | C (no benefit)  |
| Pallidal DBS                          | IV    | 8                    | U               |
| Cannabinoids *                        | IV    | 1                    | U               |
| IV amantadine                         | IV    | 1                    | U               |
| Internal globus pallidotomy           | IV    | 1                    | U               |
| Fetal neural transplants *            | IV    | 1                    | U               |
| Cerebellar direct current stimulation | IV    | 1                    | U               |

\* This medication/intervention is not available in South Korea as of Jul. 2024
