# Supplementary material for: Evidence-Based Review on Symptomatic Management of Huntington’s Disease
Source: PubMed Central journal article supplement — J Mov Disord. 2024 Aug 9;17(4):369–86. doi: 10.14802/jmd.24140 (PMC11540544; doi:10.14802/jmd.24140), 2024-08-09
Supplement: jmd-24140-Supplementary-Fig-4.pdf [file jmd-24140-Supplementary-Fig-4.pdf]

## Supplementary Figure 4. PRISMA flow diagram of studies targeting gait and balance in HD and drugs reviewed in this study

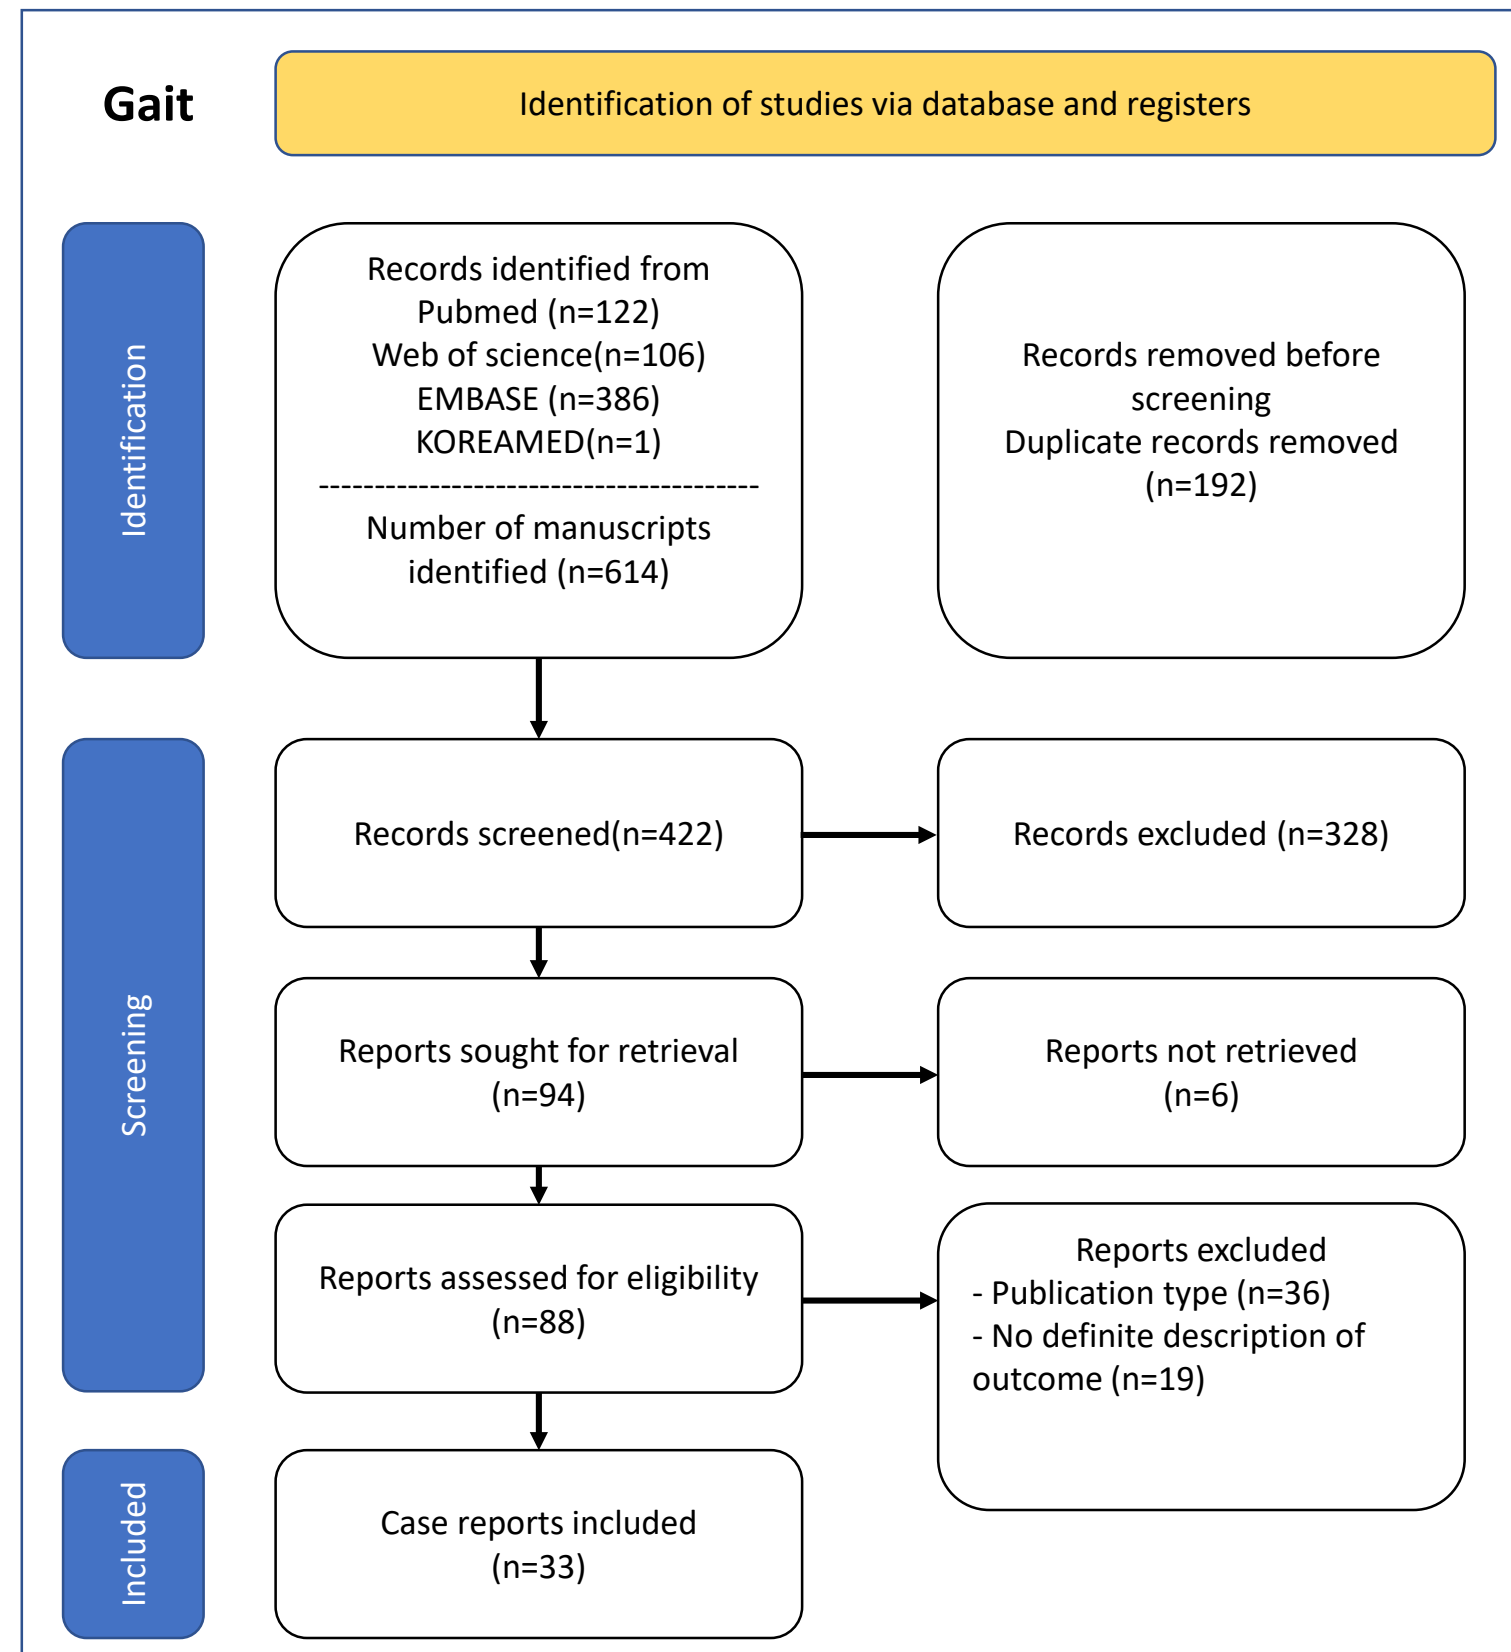

| Treatment          | Class | Number of manuscript | Level         |
|--------------------|-------|----------------------|---------------|
| Physical therapy   | II    | 1                    | C (effective) |
|                    | III   | 1                    |               |
|                    | IV    | 12                   |               |
| Pridopidine*       | I     | 1                    | B (effective) |
| Amantadine         | IV    | 1                    | U             |
| Bromocriptine      | IV    | 1                    | U             |
| Caryolanemagnolol* | IV    | 1                    | U             |
| DBS                | IV    | 4                    | U             |
| Levodopa           | IV    | 1                    | U             |
| Olanzapine         | IV    | 1                    | U             |
| Tetrabenazine      | IV    | 1                    | U             |
| Zotepine           | IV    | 1                    | level U       |

\* This medication/intervention is not available in South Korea as of Jul. 2024
