# Supplementary material for: Evidence-Based Review on Symptomatic Management of Huntington’s Disease
Source: PubMed Central journal article supplement — J Mov Disord. 2024 Aug 9;17(4):369–86. doi: 10.14802/jmd.24140 (PMC11540544; doi:10.14802/jmd.24140), 2024-08-09
Supplement: jmd-24140-Supplementary-Fig-7.pdf [file jmd-24140-Supplementary-Fig-7.pdf]

## Supplementary Figure 7. PRISMA flow diagram of studies targeting akathisia in HD

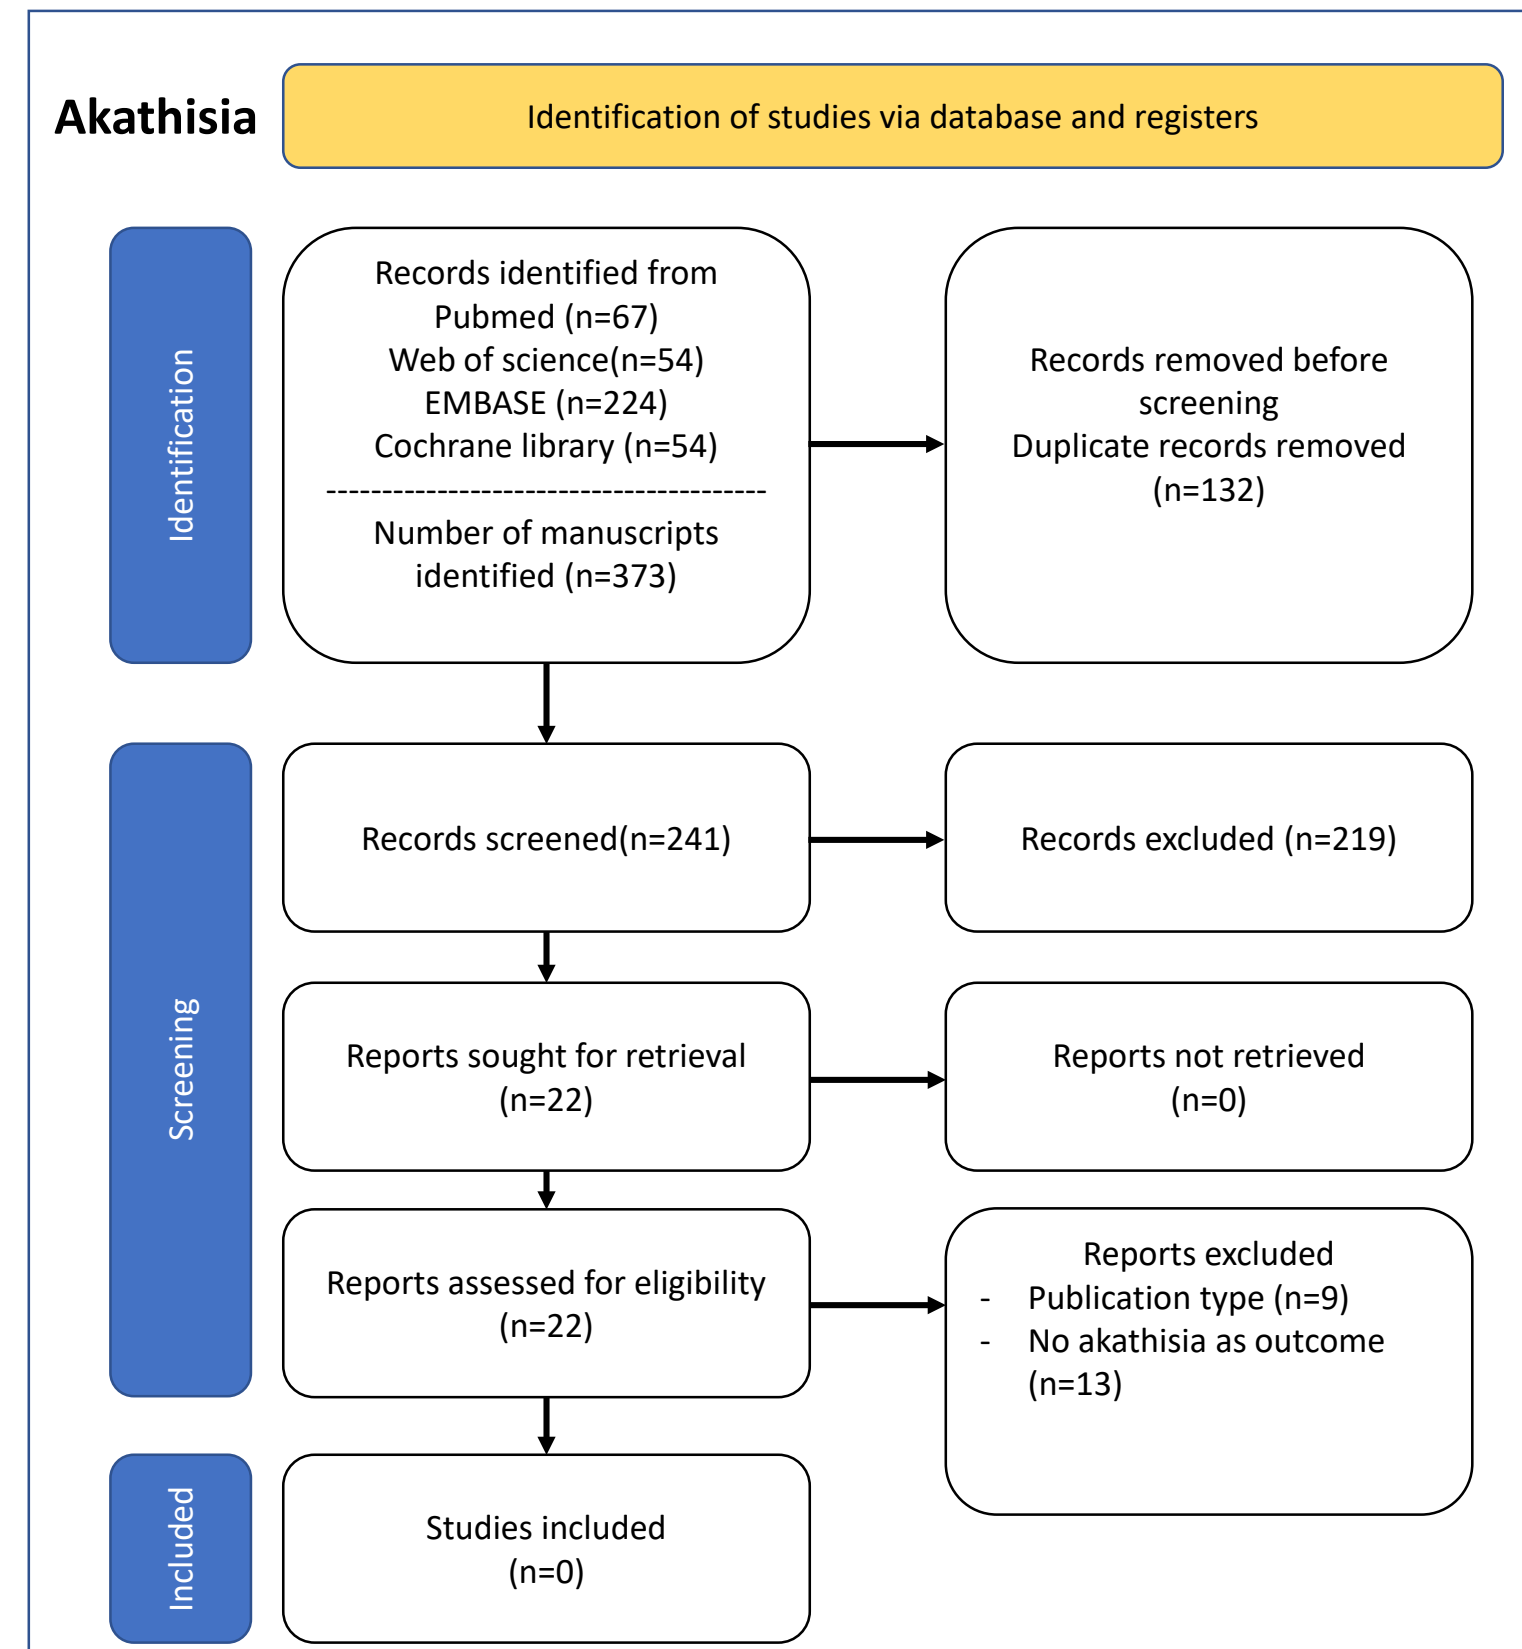

- Non identified
