# Supplementary material for: Evidence-Based Review on Symptomatic Management of Huntington’s Disease
Source: PubMed Central journal article supplement — J Mov Disord. 2024 Aug 9;17(4):369–86. doi: 10.14802/jmd.24140 (PMC11540544; doi:10.14802/jmd.24140), 2024-08-09
Supplement: jmd-24140-Supplementary-Fig-8.pdf [file jmd-24140-Supplementary-Fig-8.pdf]

## Supplementary Figure 8. PRISMA flow diagram of studies targeting apathy in HD and drugs reviewed in this study

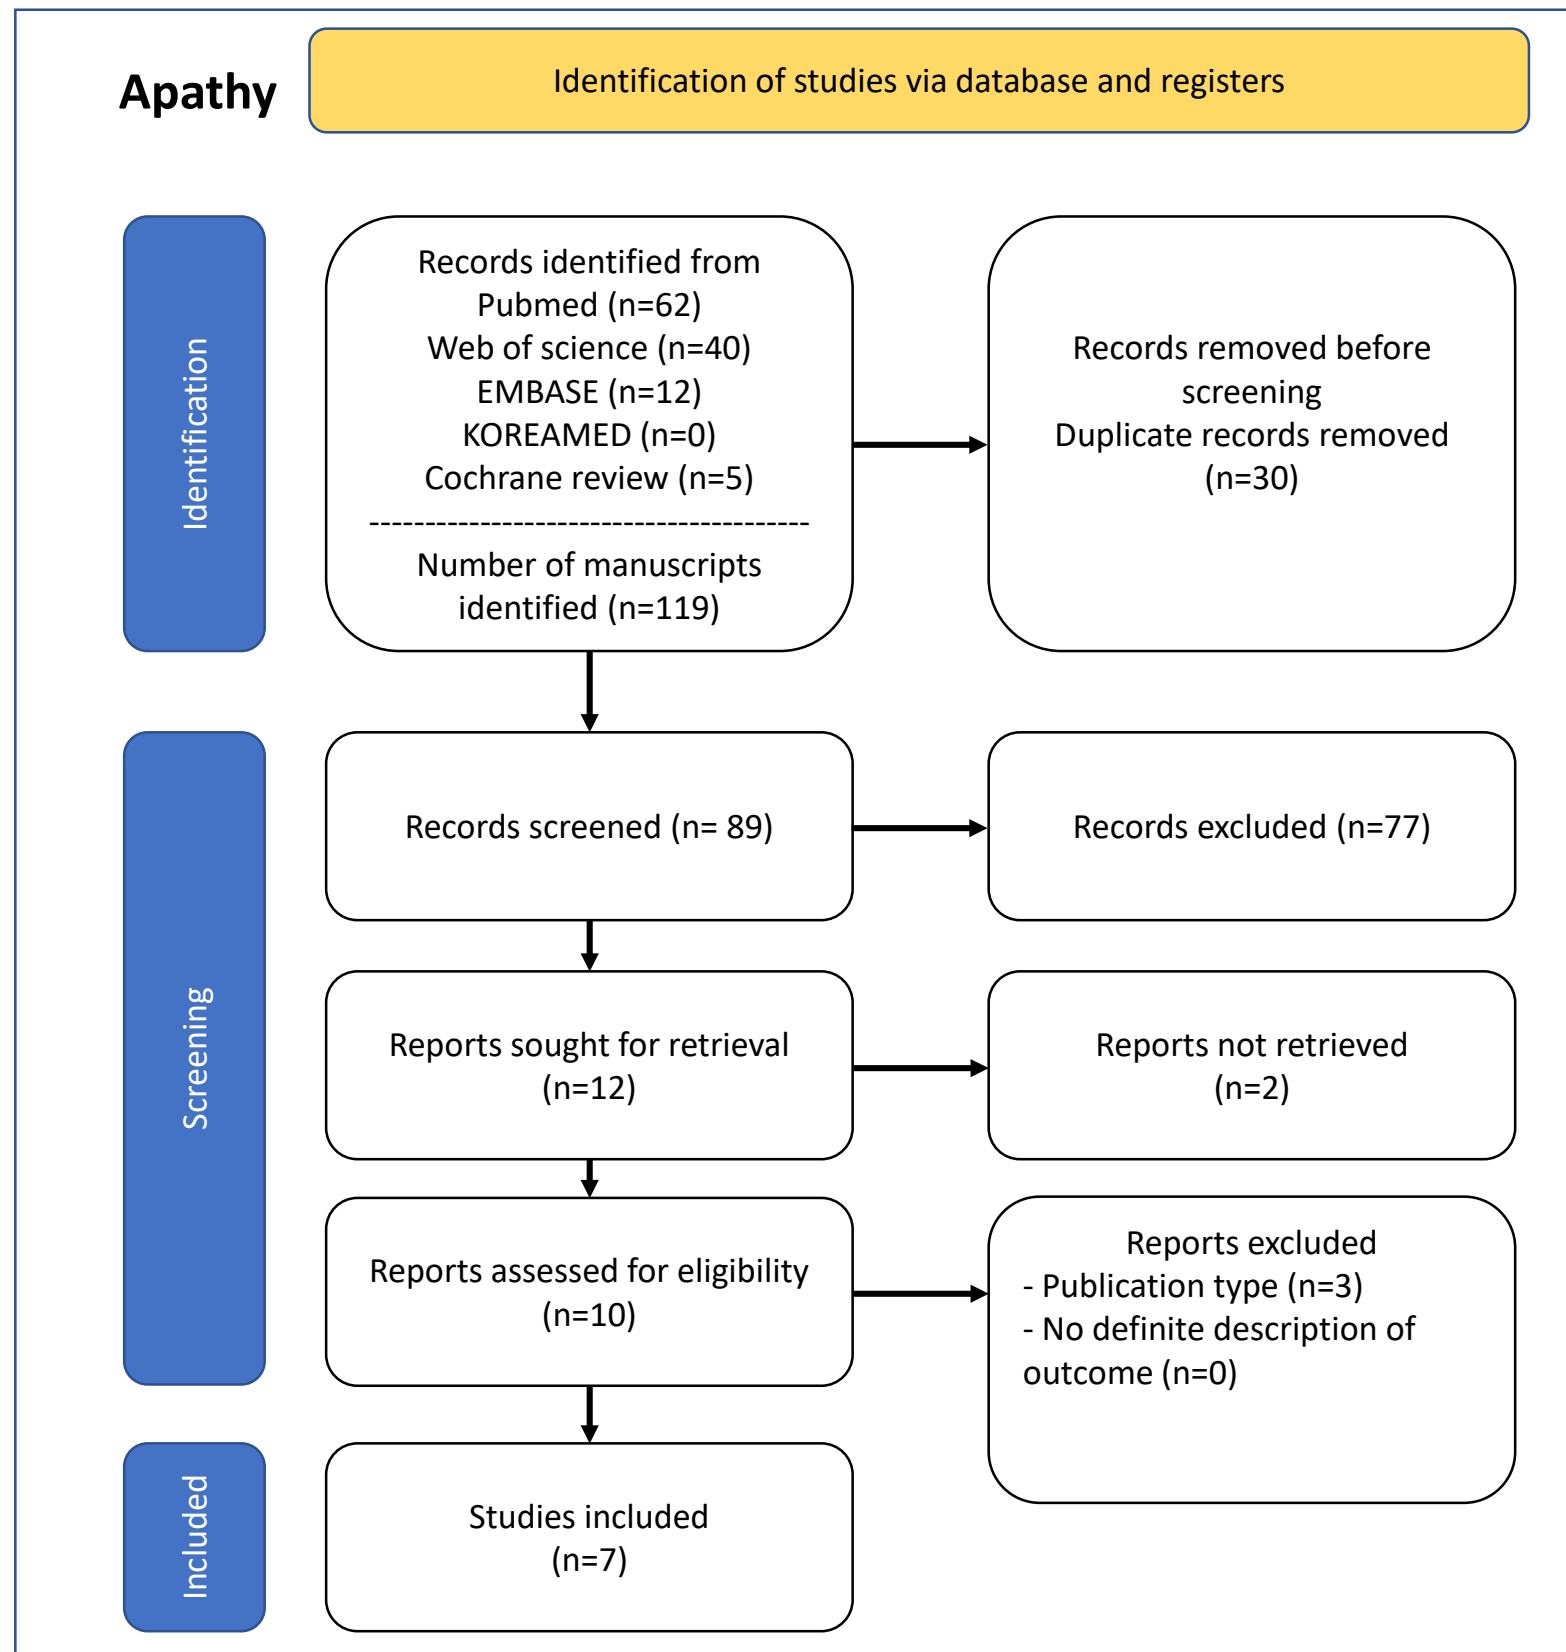

| Treatment                          | Class | Number of manuscript | Level          |
|------------------------------------|-------|----------------------|----------------|
| Bupropione                         | II    | 1                    | C (no benefit) |
| Rasagiline                         | IV    | 1                    | U              |
| Cariprazine *                      | IV    | 1                    | U              |
| Cannabinoids *                     | IV    | 1                    | U              |
| Risperidone                        | IV    | 1                    | U              |
| Contemporary dance<br>practice     | III   | 1                    | U              |
| Time-restricted ketog<br>enic diet | IV    | 1                    | U              |

\* This medication/intervention is not available in South Korea as of Jul. 2024
