# Supplementary material for: Evidence-Based Review on Symptomatic Management of Huntington’s Disease
Source: PubMed Central journal article supplement — J Mov Disord. 2024 Aug 9;17(4):369–86. doi: 10.14802/jmd.24140 (PMC11540544; doi:10.14802/jmd.24140), 2024-08-09
Supplement: jmd-24140-Supplementary-Fig-9.pdf [file jmd-24140-Supplementary-Fig-9.pdf]

## Supplementary Figure 9. PRISMA flow diagram of studies targeting depression in HD and drugs reviewed in this study

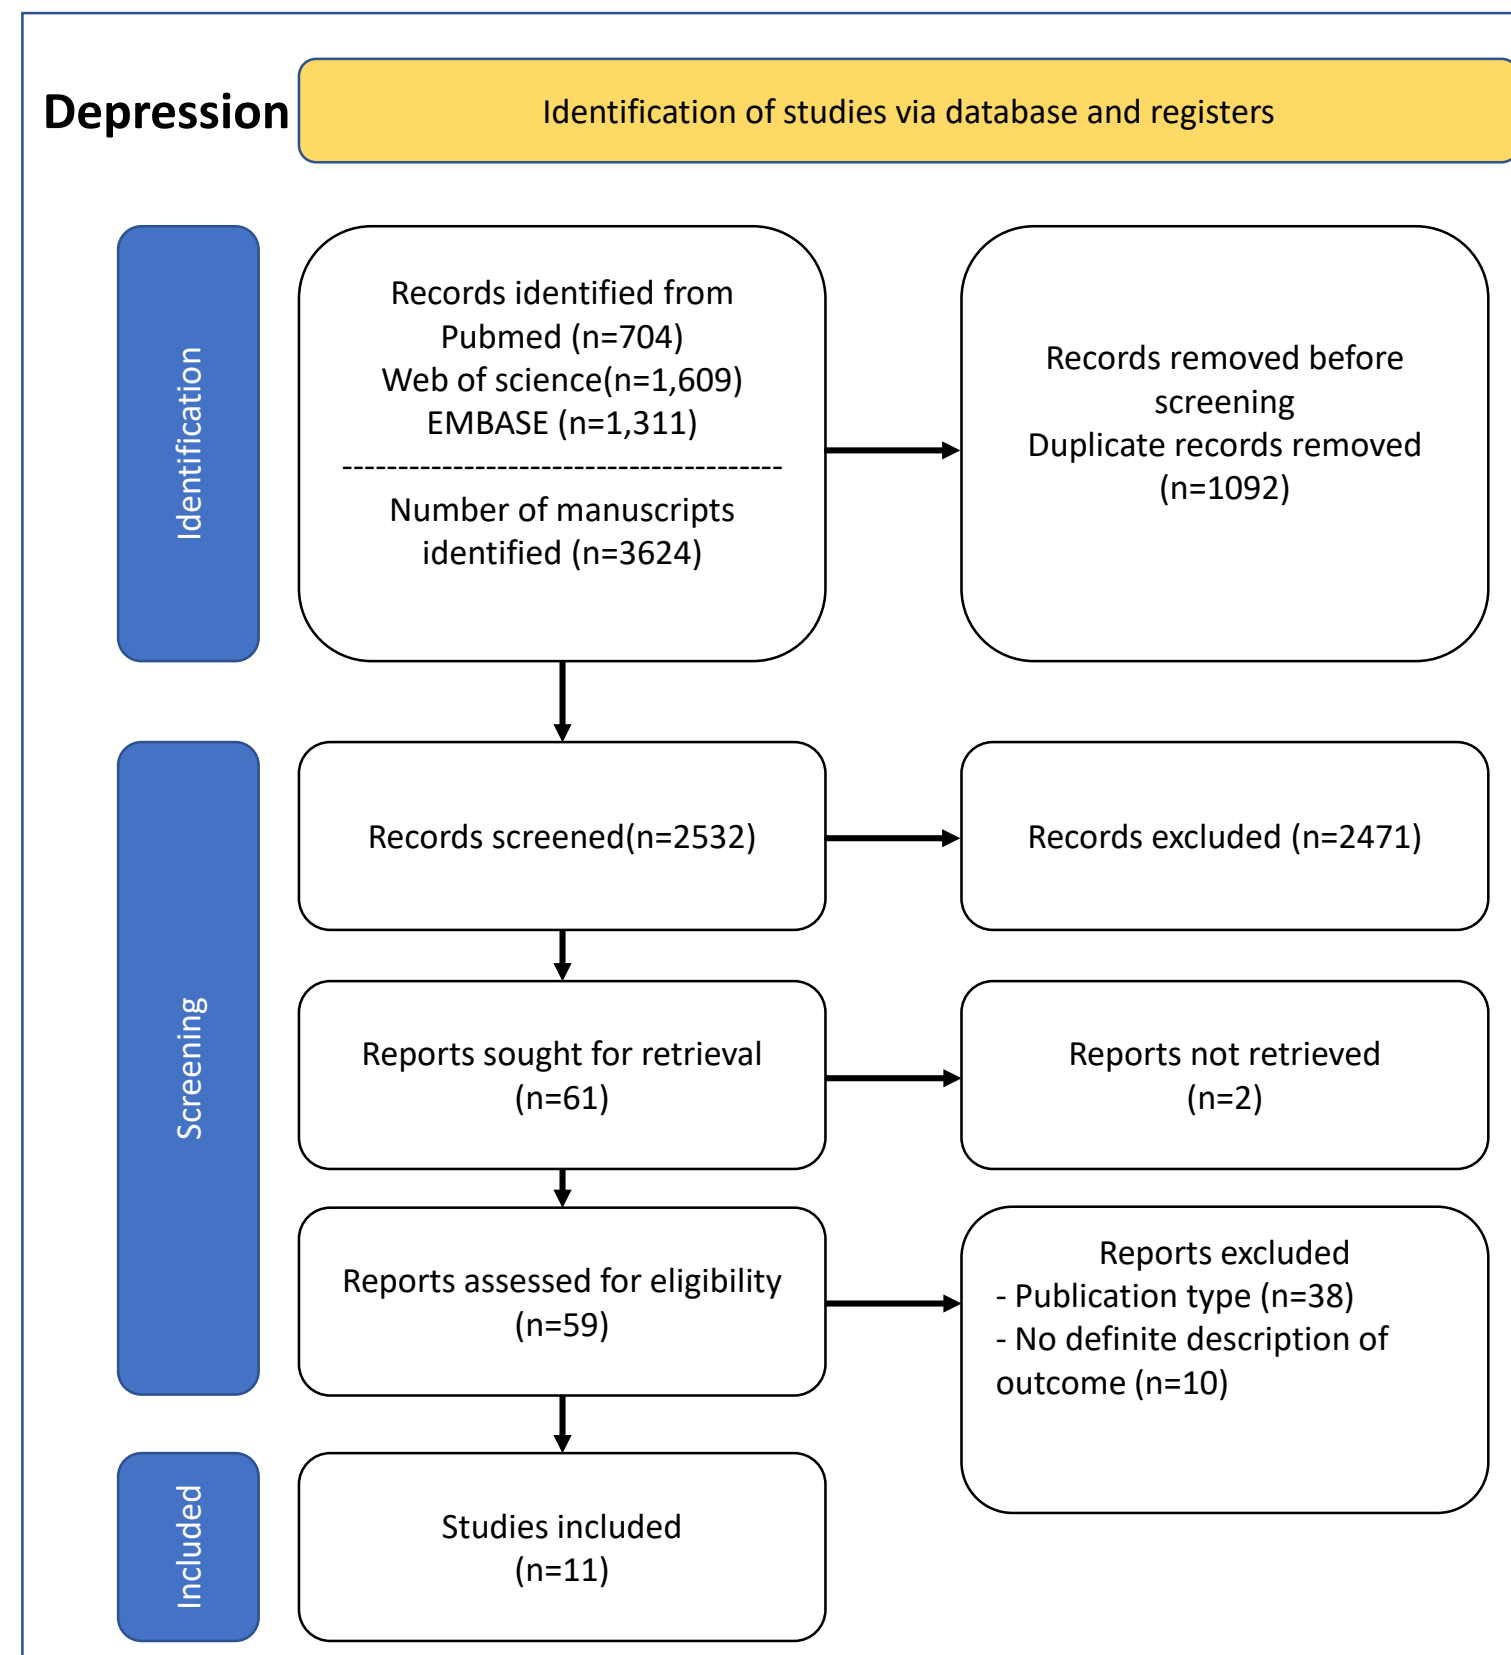

| Treatment        | Class | Number of manuscript | Level         |
|------------------|-------|----------------------|---------------|
| Citalopram       | I     | 1                    | B (effective) |
| Fluoxetine       | III   | 1                    | U             |
| Venlafaxine      | IV    | 1                    | U             |
| ECT              | IV    | 2                    | U             |
| Cariprazine*     | IV    | 1                    | U             |
| TMS              | IV    | 2                    | U             |
| Physical therapy | IV    | 2                    | U             |
| Lamotrigine      | IV    | 1                    | U             |

\* This medication/intervention is not available in South Korea as of Jul. 2024
