# Supplementary material for: Evidence-Based Review on Symptomatic Management of Huntington’s Disease
Source: PubMed Central journal article supplement — J Mov Disord. 2024 Aug 9;17(4):369–86. doi: 10.14802/jmd.24140 (PMC11540544; doi:10.14802/jmd.24140), 2024-08-09
Supplement: jmd-24140-Supplementary-Fig-11.pdf [file jmd-24140-Supplementary-Fig-11.pdf]

## Supplementary Figure 11. PRISMA flow diagram of studies targeting obsession in HD and drugs reviewed in this study

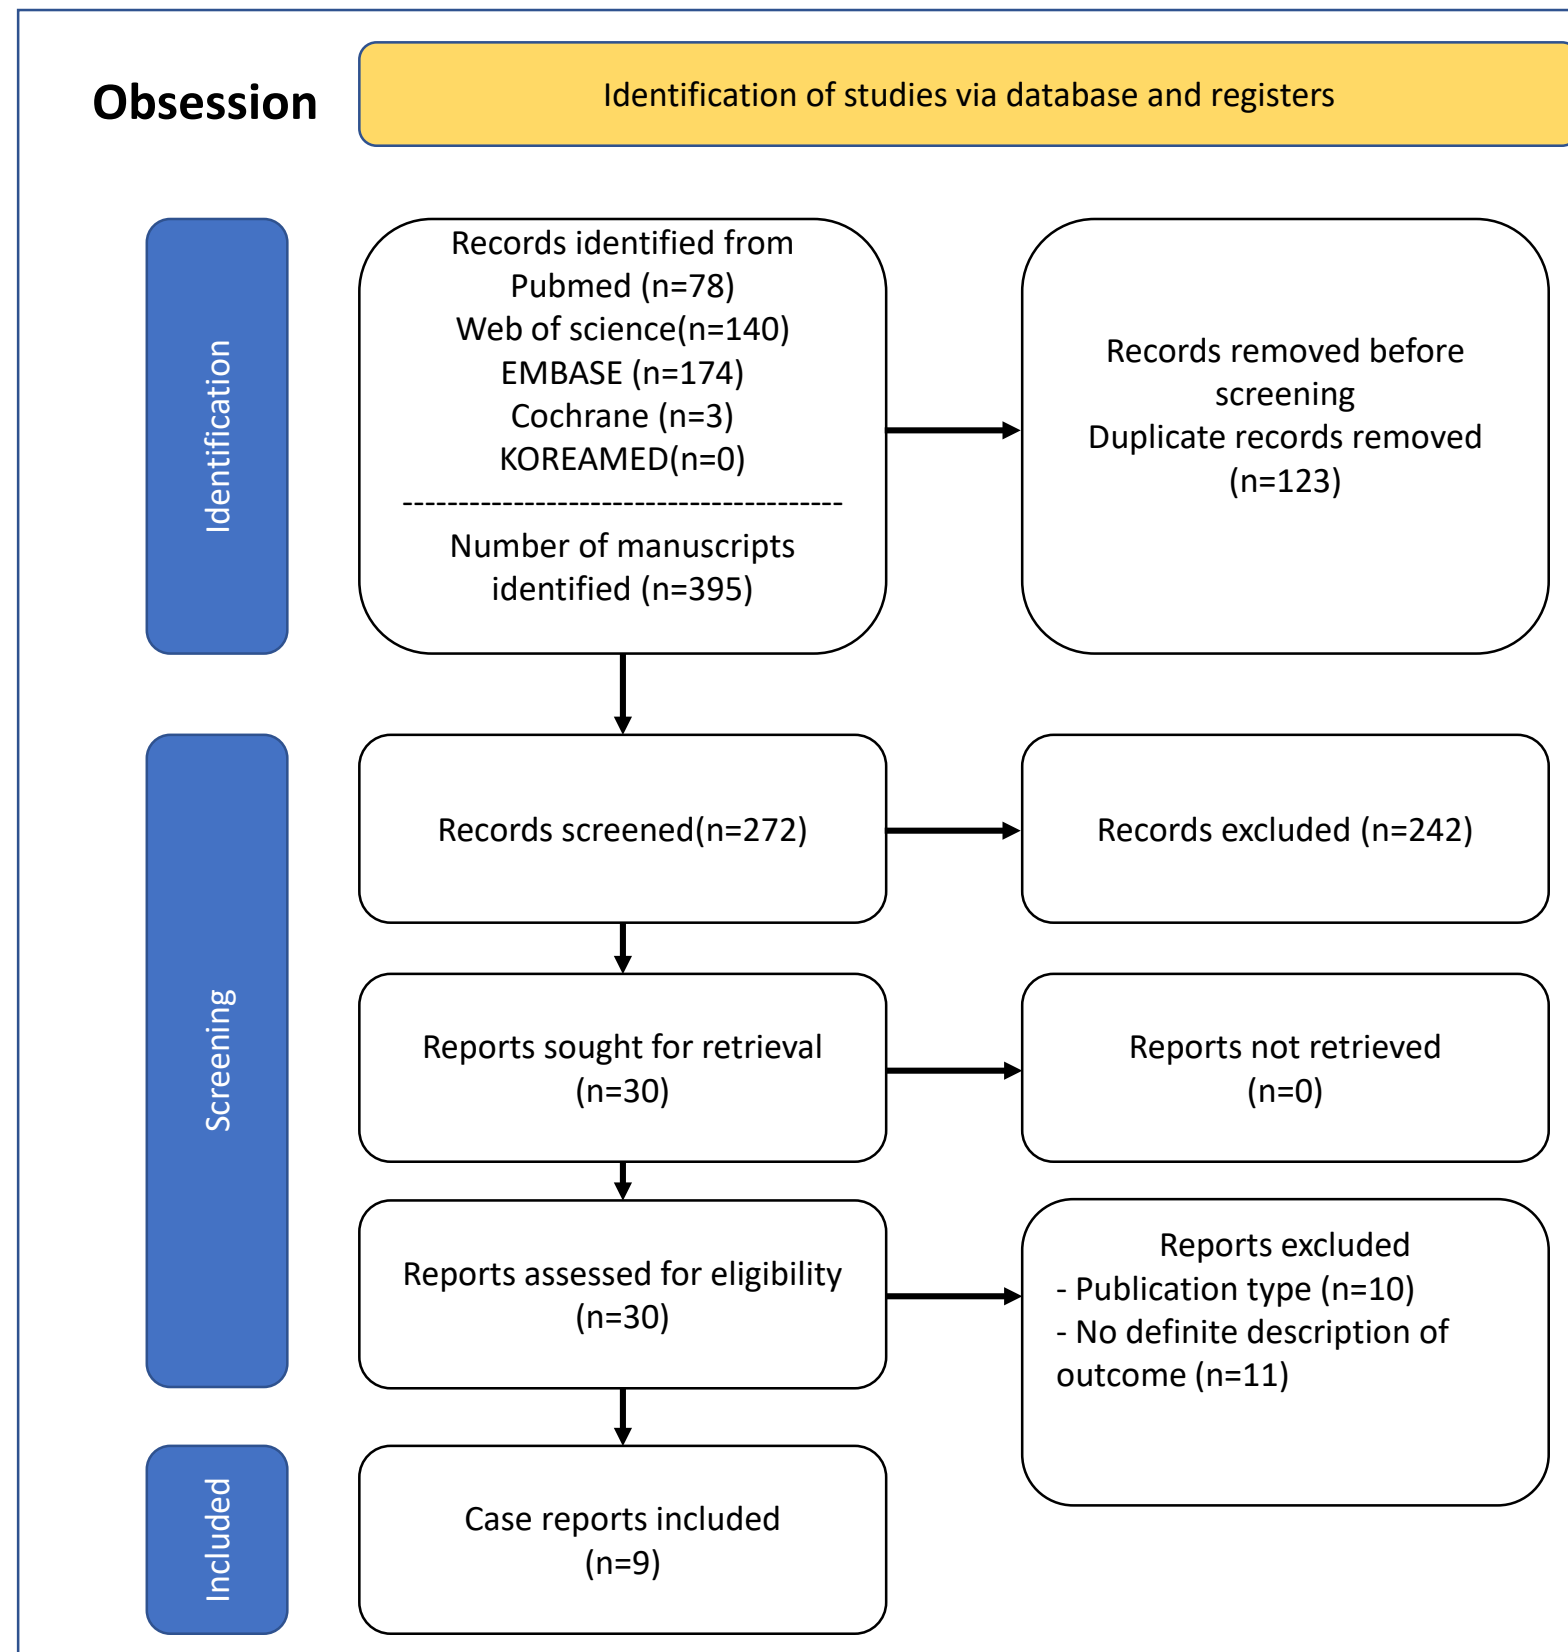

| Treatment                                             | Class | Number of manuscript | Level |
|-------------------------------------------------------|-------|----------------------|-------|
| CBT                                                   | IV    | 1                    | U     |
| SSRI (fluoxetine, sertraline)                         | IV    | 2                    | U     |
| TCA (clomipramine)                                    | IV    | 1                    | U     |
| antipsychotics (paliperidone, quetiapine, olanzapine) | IV    | 3                    | U     |

\* All medications and interventions in the table is available in South Korea as of Jul. 2024
