# Supplementary material for: Evidence-Based Review on Symptomatic Management of Huntington’s Disease
Source: PubMed Central journal article supplement — J Mov Disord. 2024 Aug 9;17(4):369–86. doi: 10.14802/jmd.24140 (PMC11540544; doi:10.14802/jmd.24140), 2024-08-09
Supplement: jmd-24140-Supplementary-Fig-12.pdf [file jmd-24140-Supplementary-Fig-12.pdf]

## Supplementary Figure 12. PRISMA flow diagram of studies targeting irritability in HD and drugs reviewed in this study

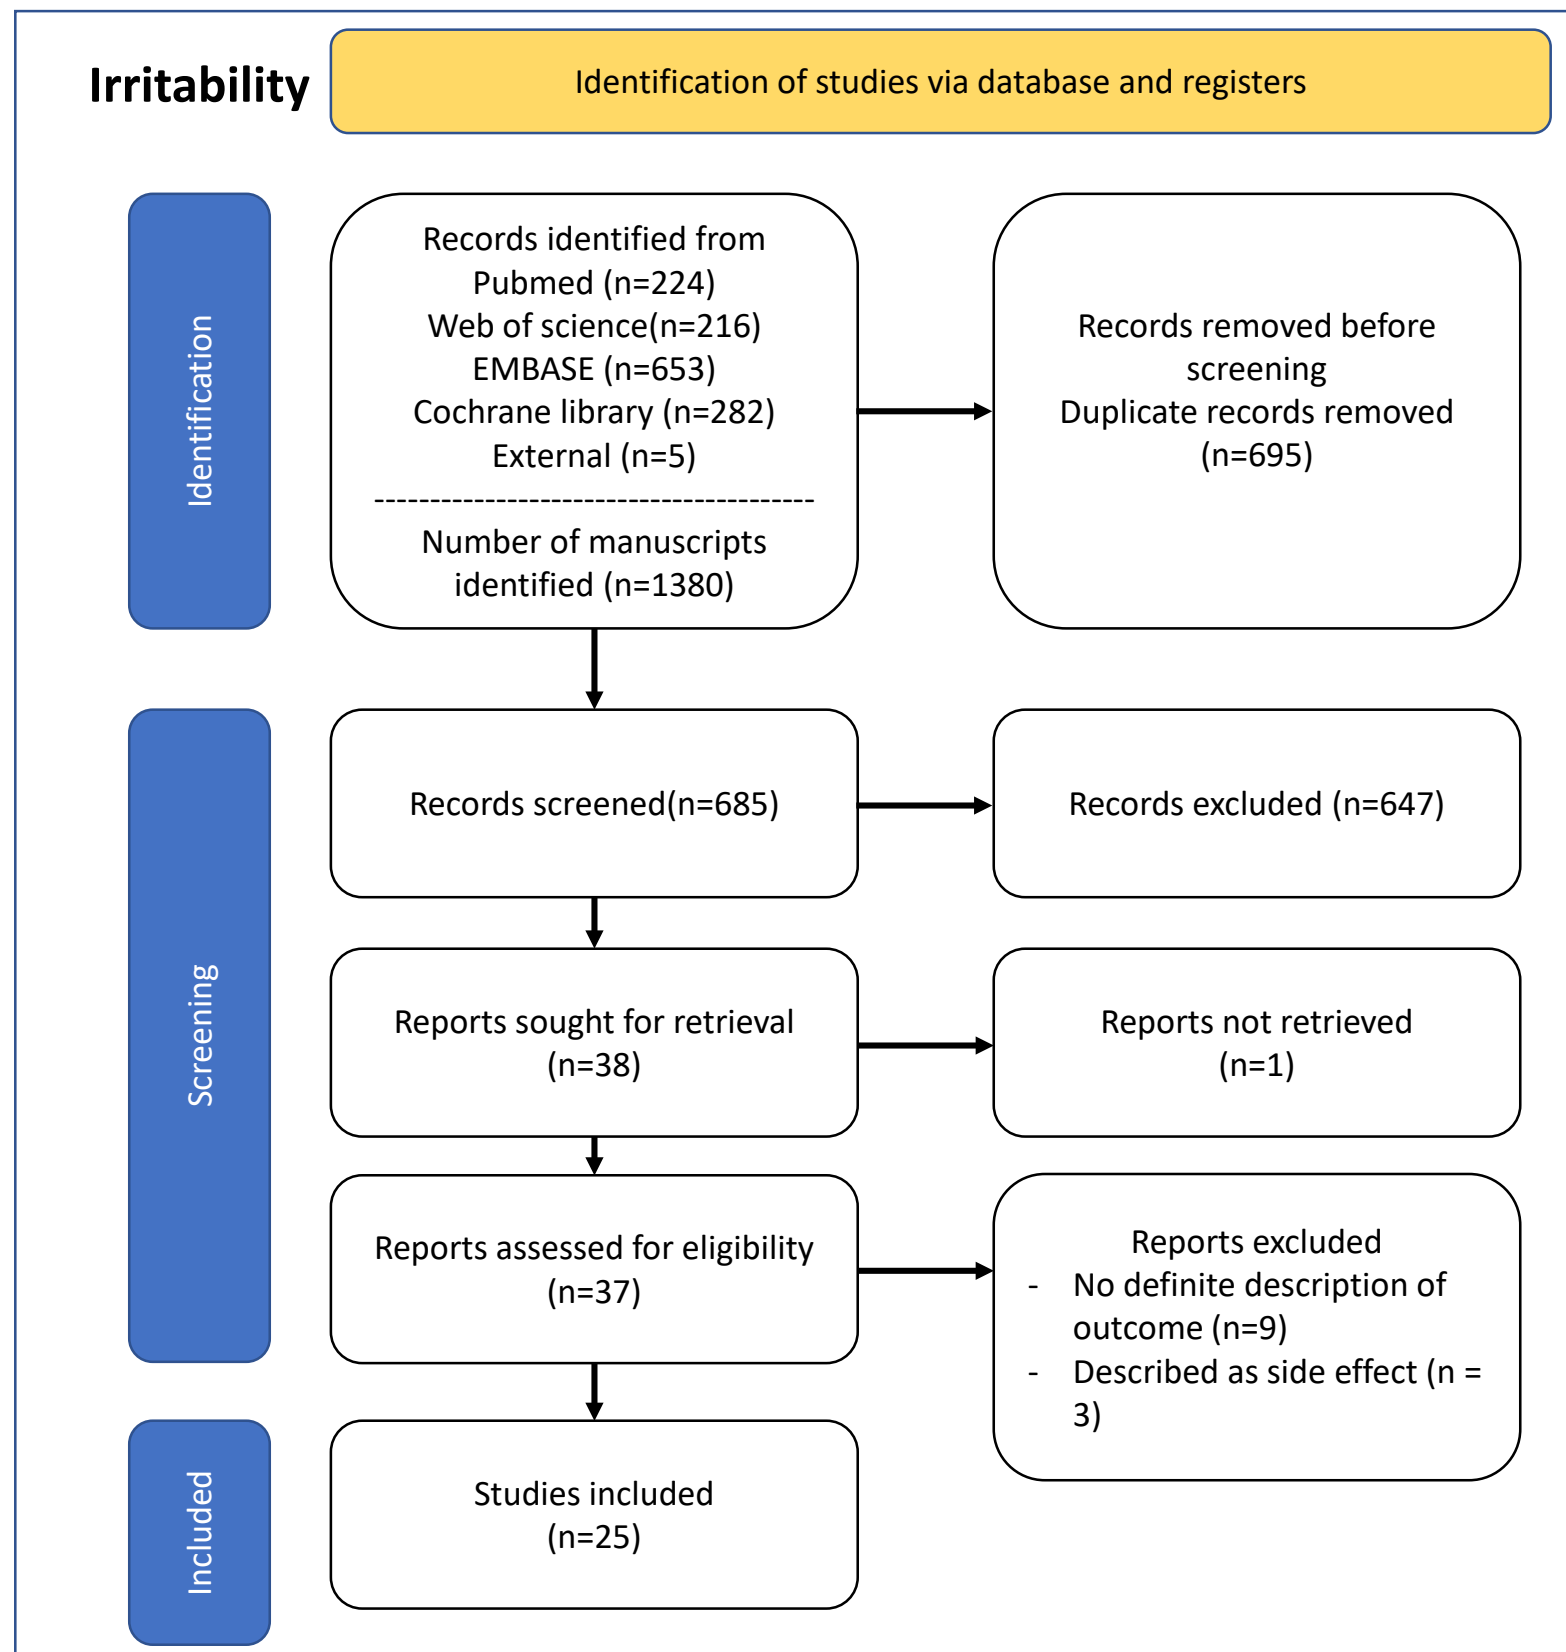

| Treatment               | Class | Number of manuscript | Level         |
|-------------------------|-------|----------------------|---------------|
| Aripiprazole            | II    | 1                    | C (effective) |
|                         | IV    | 2                    |               |
| Buspirone               | IV    | 3                    | U             |
| Cannabinoid*            | IV    | 2                    | U             |
| olanzapine              | IV    | 3                    | U             |
| Risperidone             | IV    | 2                    | U             |
| Fluoxetine              | IV    | 1                    | U             |
| Valproate               | IV    | 2                    | U             |
| quetiapine              | IV    | 1                    | U             |
| Sertraline              | IV    | 1                    | U             |
| Lamotrigine             | IV    | 1                    | U             |
| Lithium and haloperidol | III   | 1                    | U             |
| propranolol             | IV    | 2                    | U             |
| Donepezil               | IV    | 1                    | U             |
| Srx246                  | IV    | 1                    | U             |
| ECT                     | IV    | 1                    | U             |

\* This medication/intervention is not available in South Korea as of Jul. 2024
