# Supplementary material for: Evidence-Based Review on Symptomatic Management of Huntington’s Disease
Source: PubMed Central journal article supplement — J Mov Disord. 2024 Aug 9;17(4):369–86. doi: 10.14802/jmd.24140 (PMC11540544; doi:10.14802/jmd.24140), 2024-08-09
Supplement: jmd-24140-Supplementary-Fig-13.pdf [file jmd-24140-Supplementary-Fig-13.pdf]

### Supplementary Figure 13. PRISMA flow diagram of studies targeting anxiety in HD and drugs reviewed in this study

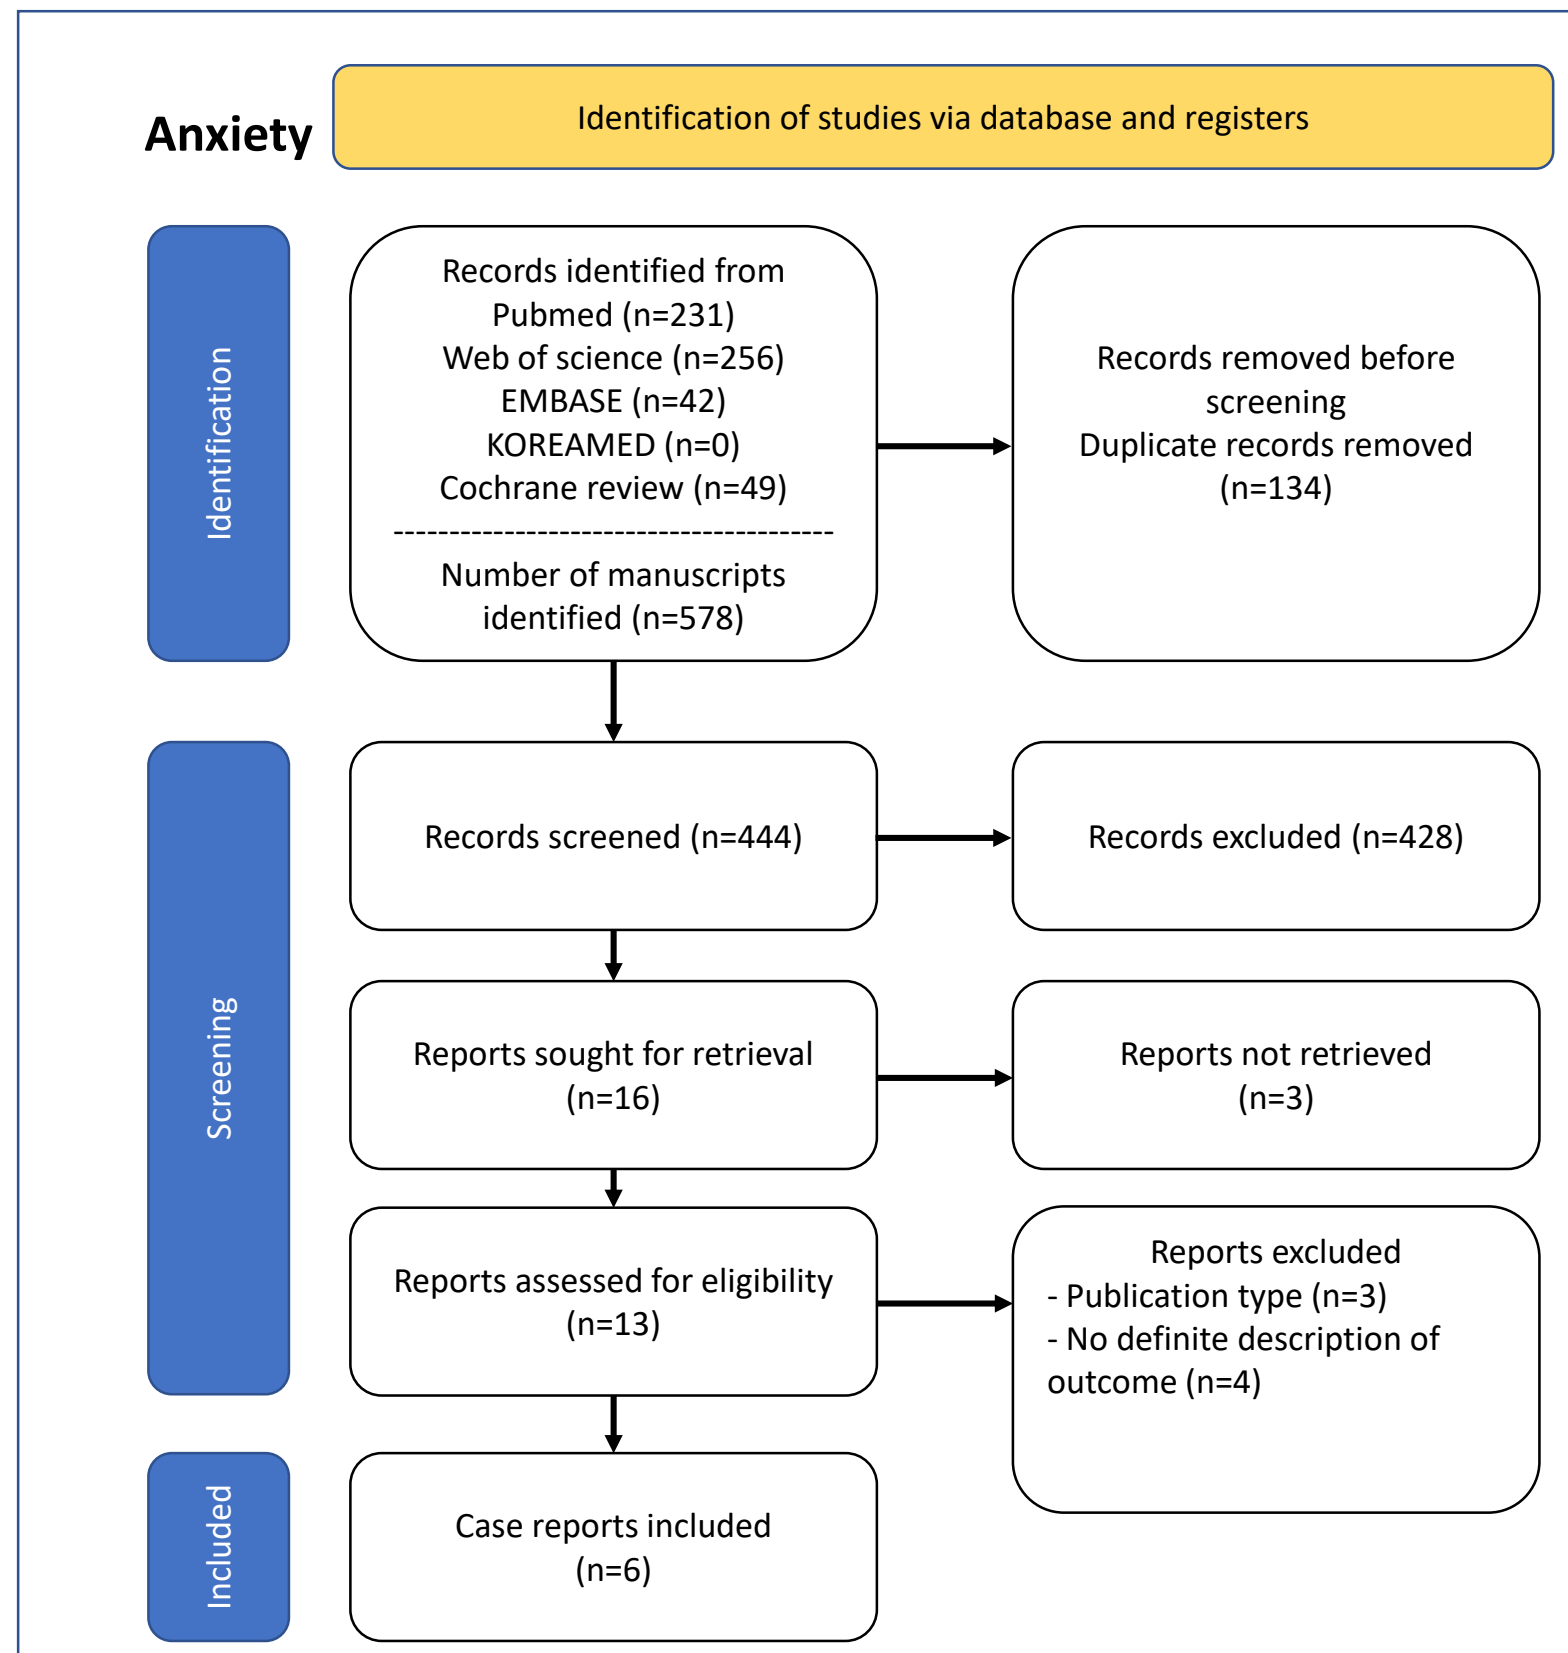

| Treatment                                     | Class | Number of manuscript | Level          |
|-----------------------------------------------|-------|----------------------|----------------|
| Pridopidine*                                  | II    | 1                    | C (no benefit) |
| Olanzapine                                    | IV    | 1                    | U              |
| Risperidone                                   | IV    | 1                    | U              |
| Multidisciplinary rehabilitation intervention | III   | 1                    | U              |
|                                               | IV    | 1                    |                |
| Cognitive-behavioral therapy                  | IV    | 1                    | U              |

\* This medication/intervention is not available in South Korea as of Jul. 2024
