# Supplementary material for: Evidence-Based Review on Symptomatic Management of Huntington’s Disease
Source: PubMed Central journal article supplement — J Mov Disord. 2024 Aug 9;17(4):369–86. doi: 10.14802/jmd.24140 (PMC11540544; doi:10.14802/jmd.24140), 2024-08-09
Supplement: jmd-24140-Supplementary-Fig-14.pdf [file jmd-24140-Supplementary-Fig-14.pdf]

## Supplementary Figure 14. PRISMA flow diagram of studies targeting sexual dysfunction in HD and drugs reviewed in this study

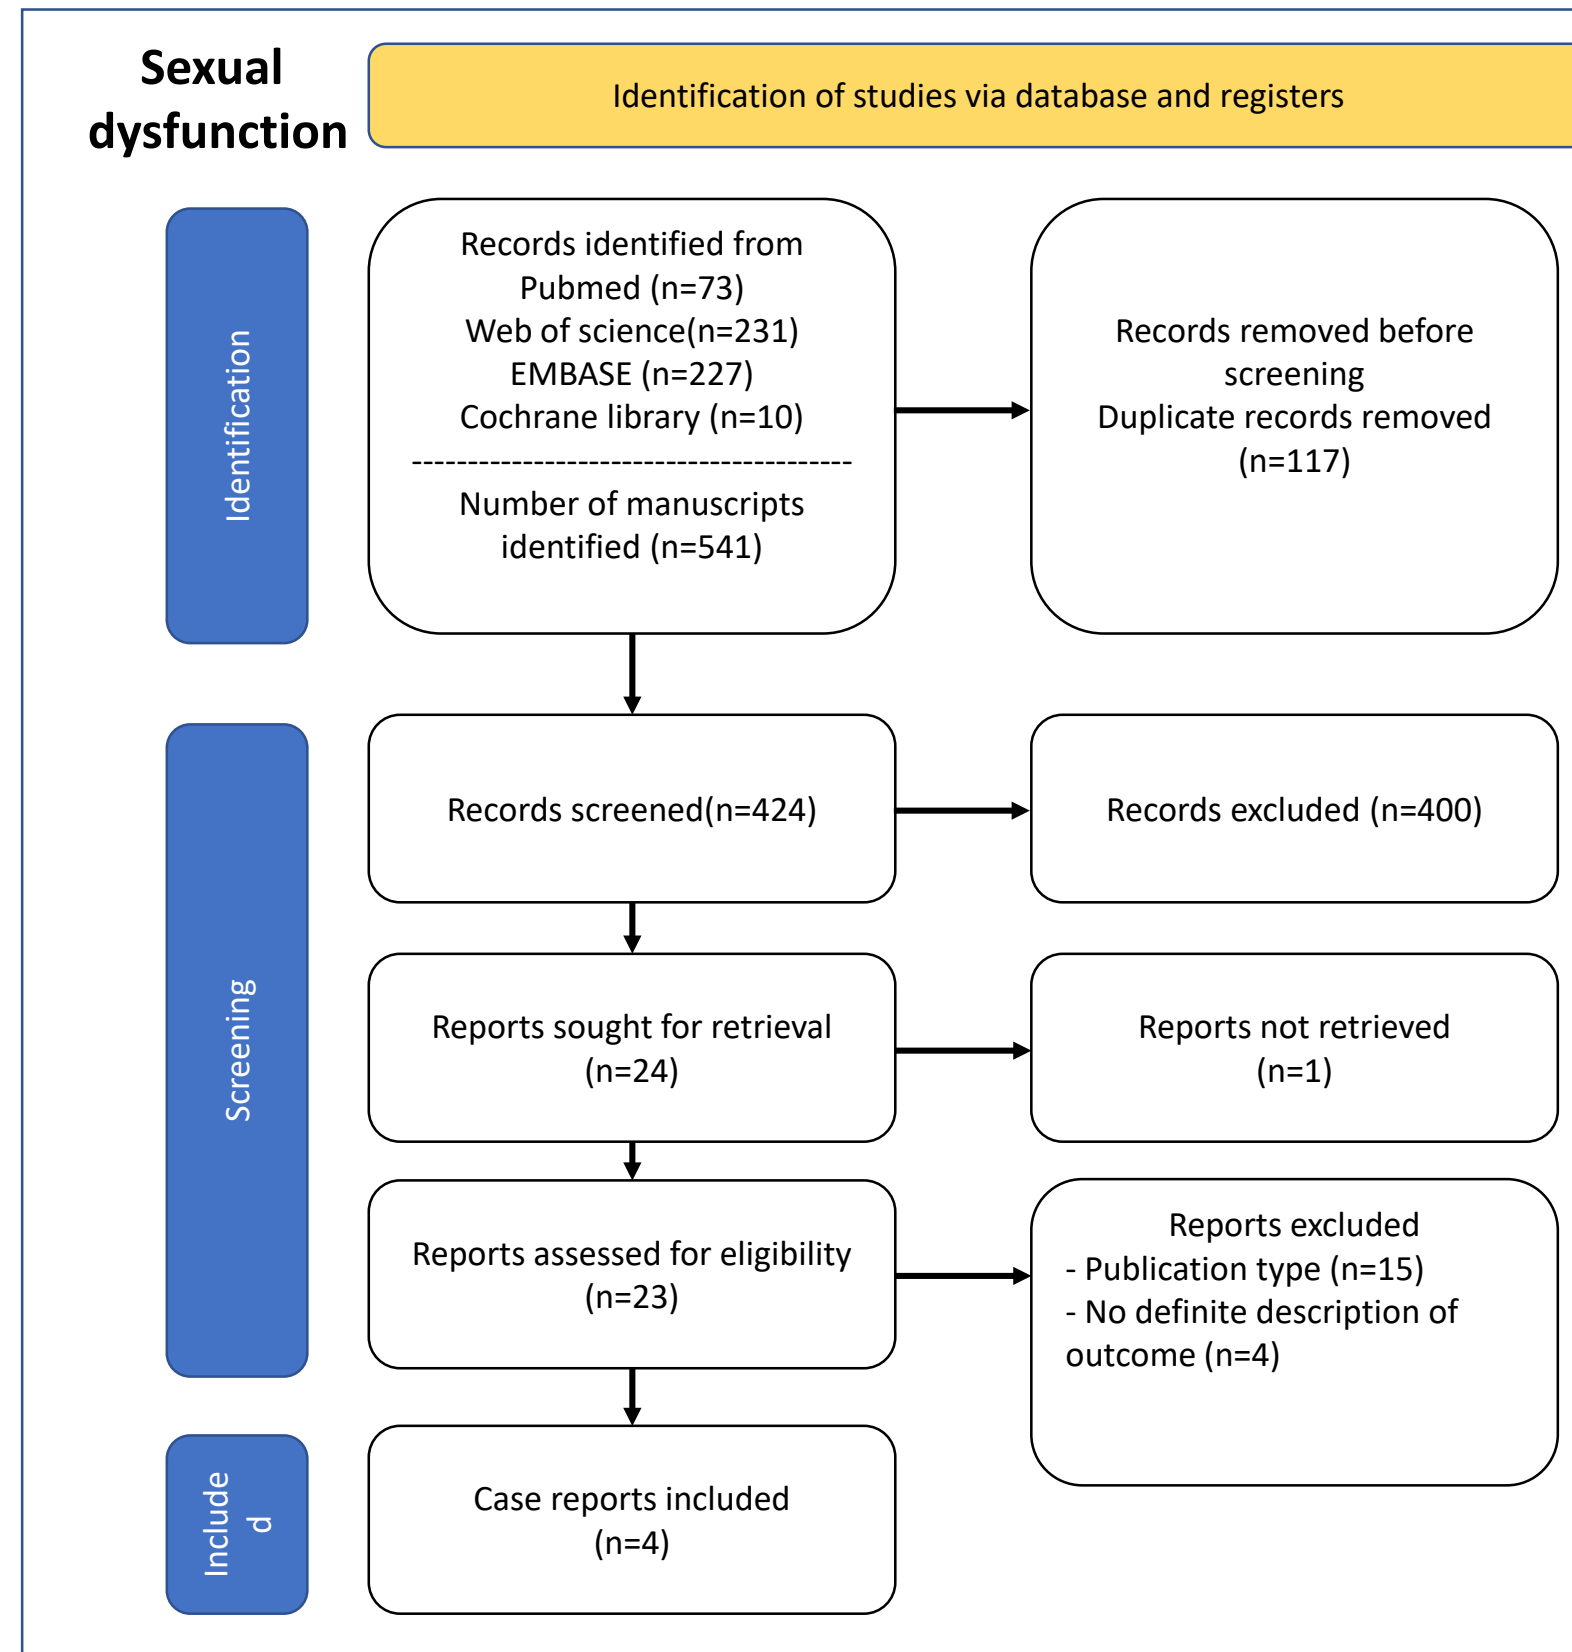

| Treatment           | Class | Number of manuscript | Level         |
|---------------------|-------|----------------------|---------------|
| Medroxyprogesterone | IV    | 1                    | U (effective) |
| Cyproterone         | IV    | 1                    | U (effective) |
| Haloperidol         | IV    | 1                    | U (effective) |
| Leuprolide acetate  | IV    | 1                    | U (effective) |

\* All medications and interventions in the table is available in South Korea as of Jul. 2024
