# Supplementary material for: Evidence-Based Review on Symptomatic Management of Huntington’s Disease
Source: PubMed Central journal article supplement — J Mov Disord. 2024 Aug 9;17(4):369–86. doi: 10.14802/jmd.24140 (PMC11540544; doi:10.14802/jmd.24140), 2024-08-09
Supplement: jmd-24140-Supplementary-Fig-15.pdf [file jmd-24140-Supplementary-Fig-15.pdf]

## Supplementary Figure 15. Drugs reviewed that targeted dementia for HD in this study

| Treatment                | Class | Number of manuscript | Level           |
|--------------------------|-------|----------------------|-----------------|
| Pridopidine*             | I     | 3                    | A (no effect)   |
| Donepezil                | I     | 1                    | B (no benefit)  |
| TDCS/TMS                 | II    | 1                    | U(no benefit)   |
|                          | IV    | 1                    |                 |
| Atomoxetine              | II    | 1                    | C (no benefit)  |
| Cannabinoid(sativex)*    | II    | 1                    | C (no benefit)  |
| Citalopram               | II    | 1                    | C (no benefit)  |
| Fetal striatal grafting* | II    | 1                    | C (no benefit)  |
|                          | III   | 1                    |                 |
| Gpi DBS                  | II    | 1                    | U (conflicting) |
|                          | III   | 3                    |                 |
|                          | IV    | 4                    |                 |
| Rivastigmine             | I     | 1                    | U (conflicting) |
|                          | II    | 1                    |                 |
| Latrepirdine*            | I     | 2                    | U (conflicting) |
| Rehab/Physical therapy   | IV    | 4                    | U               |
| Cariprazine*             | IV    | 1                    | U               |
| Ketogenic diet           | IV    | 1                    | U               |
| memantine                | IV    | 1                    | U               |

\* This medication/intervention is not available in South Korea as of Jul. 2024
