# Supplementary material for: Evidence-Based Review on Symptomatic Management of Huntington’s Disease
Source: PubMed Central journal article supplement — J Mov Disord. 2024 Aug 9;17(4):369–86. doi: 10.14802/jmd.24140 (PMC11540544; doi:10.14802/jmd.24140), 2024-08-09
Supplement: jmd-24140-Supplementary-Fig-16.pdf [file jmd-24140-Supplementary-Fig-16.pdf]

**Supplementary Figure 16. PRISMA flow diagram of studies targeting psychosis/hallucination in HD and drugs reviewed in this study**

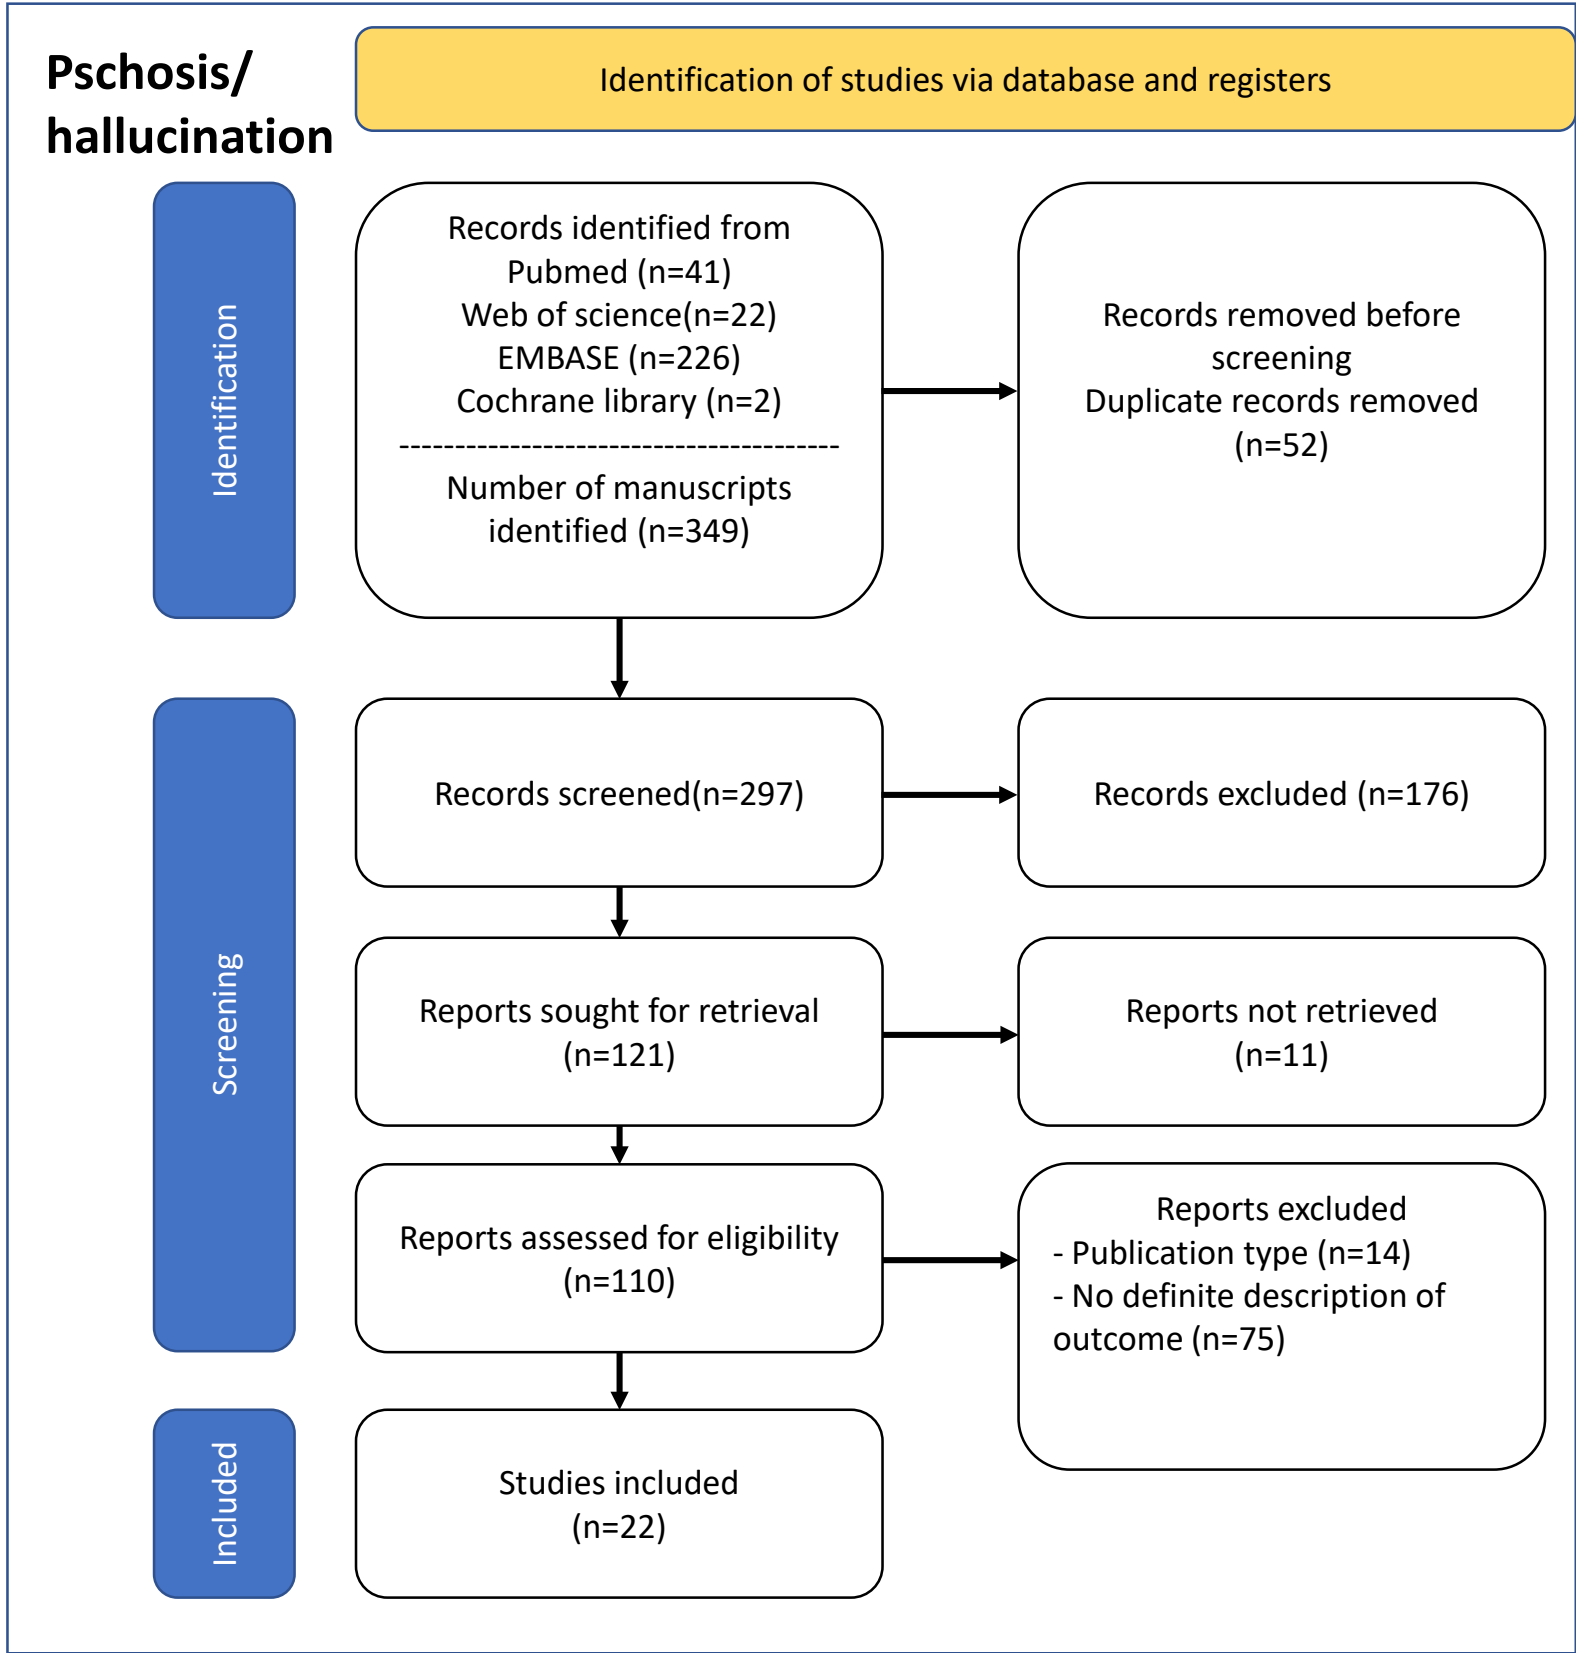

| Treatment    | Class | Number of manuscript | Level         |
|--------------|-------|----------------------|---------------|
| Sativex*     | III   | 1                    | U (effective) |
| ECT          | IV    | 7                    | U (effective) |
| Quetiapine   | IV    | 2                    | U (effective) |
| Risperidone  | IV    | 5                    | U (effective) |
| Olanzapine   | IV    | 2                    | U (effective) |
| Clozapine    | IV    | 3                    | U (effective) |
| Aripiprazole | IV    | 3                    | U (effective) |

\* This medication/intervention is not available in South Korea as of Jul. 2024
