# Supplementary material for: Evidence-Based Review on Symptomatic Management of Huntington’s Disease
Source: PubMed Central journal article supplement — J Mov Disord. 2024 Aug 9;17(4):369–86. doi: 10.14802/jmd.24140 (PMC11540544; doi:10.14802/jmd.24140), 2024-08-09
Supplement: jmd-24140-Supplementary-Fig-17.pdf [file jmd-24140-Supplementary-Fig-17.pdf]

## Supplementary Figure 17. PRISMA flow diagram of studies targeting sleep dysfunction in HD and drugs reviewed in this study

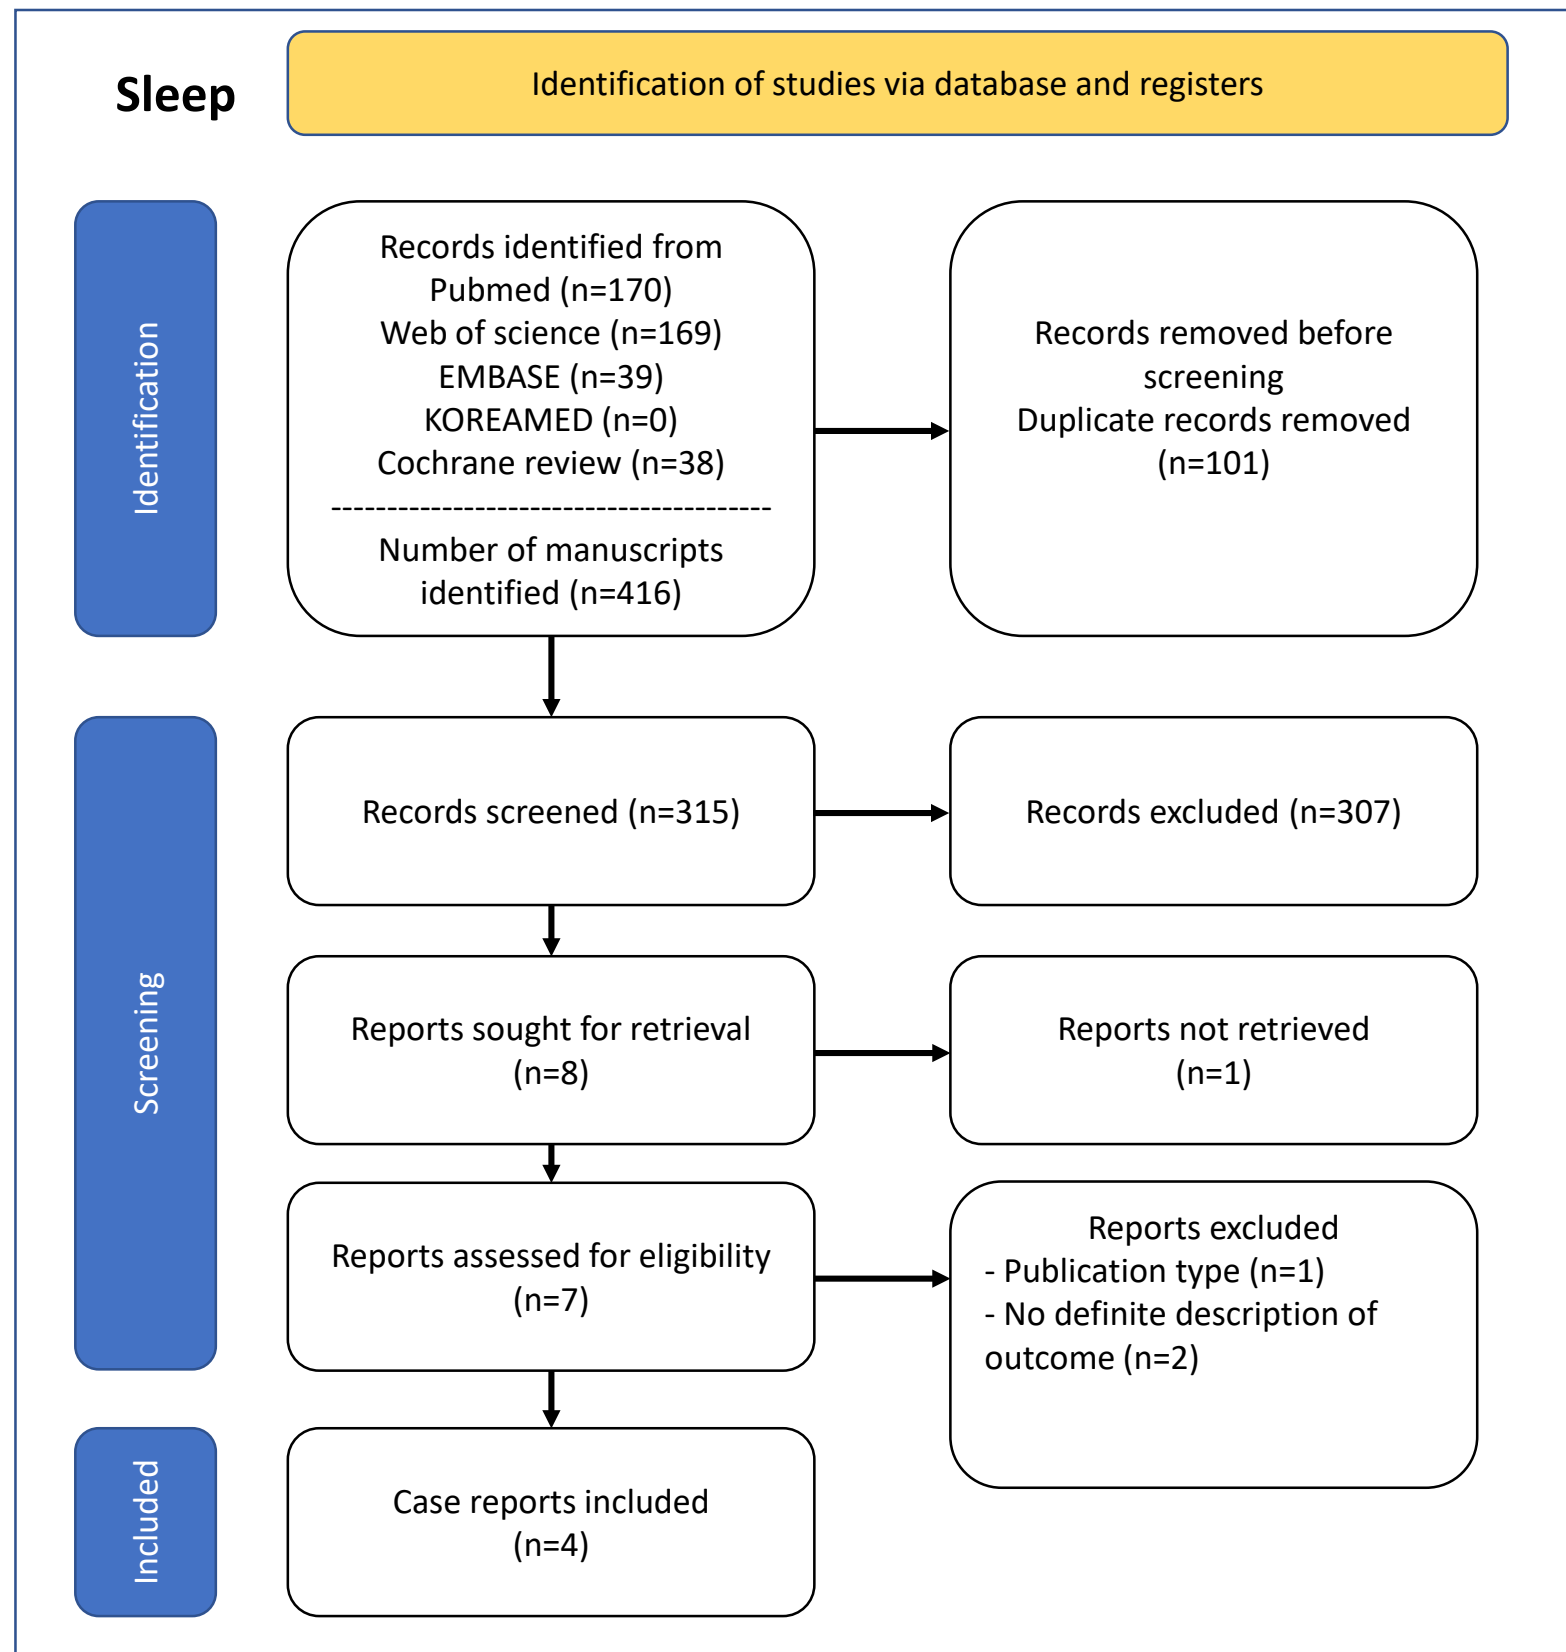

| Treatment                        | Class | Number of manuscript | Level          |
|----------------------------------|-------|----------------------|----------------|
| Pridopidine *                    | II    | 1                    | C (no benefit) |
| CPAP (in HD with OSA)            | IV    | 1                    | U              |
| Quetiapine                       | IV    | 1                    | U              |
| Multidisciplinary rehabilitation | III   | 1                    | U              |

\* This medication/intervention is not available in South Korea as of Jul. 2024
