# Supplementary material for: Evidence-Based Review on Symptomatic Management of Huntington’s Disease
Source: PubMed Central journal article supplement — J Mov Disord. 2024 Aug 9;17(4):369–86. doi: 10.14802/jmd.24140 (PMC11540544; doi:10.14802/jmd.24140), 2024-08-09
Supplement: jmd-24140-Supplementary-Fig-20.pdf [file jmd-24140-Supplementary-Fig-20.pdf]

**Supplementary Figure 20. PRISMA flow diagram of studies targeting respiratory dysfunction in HD and drugs reviewed in this study**

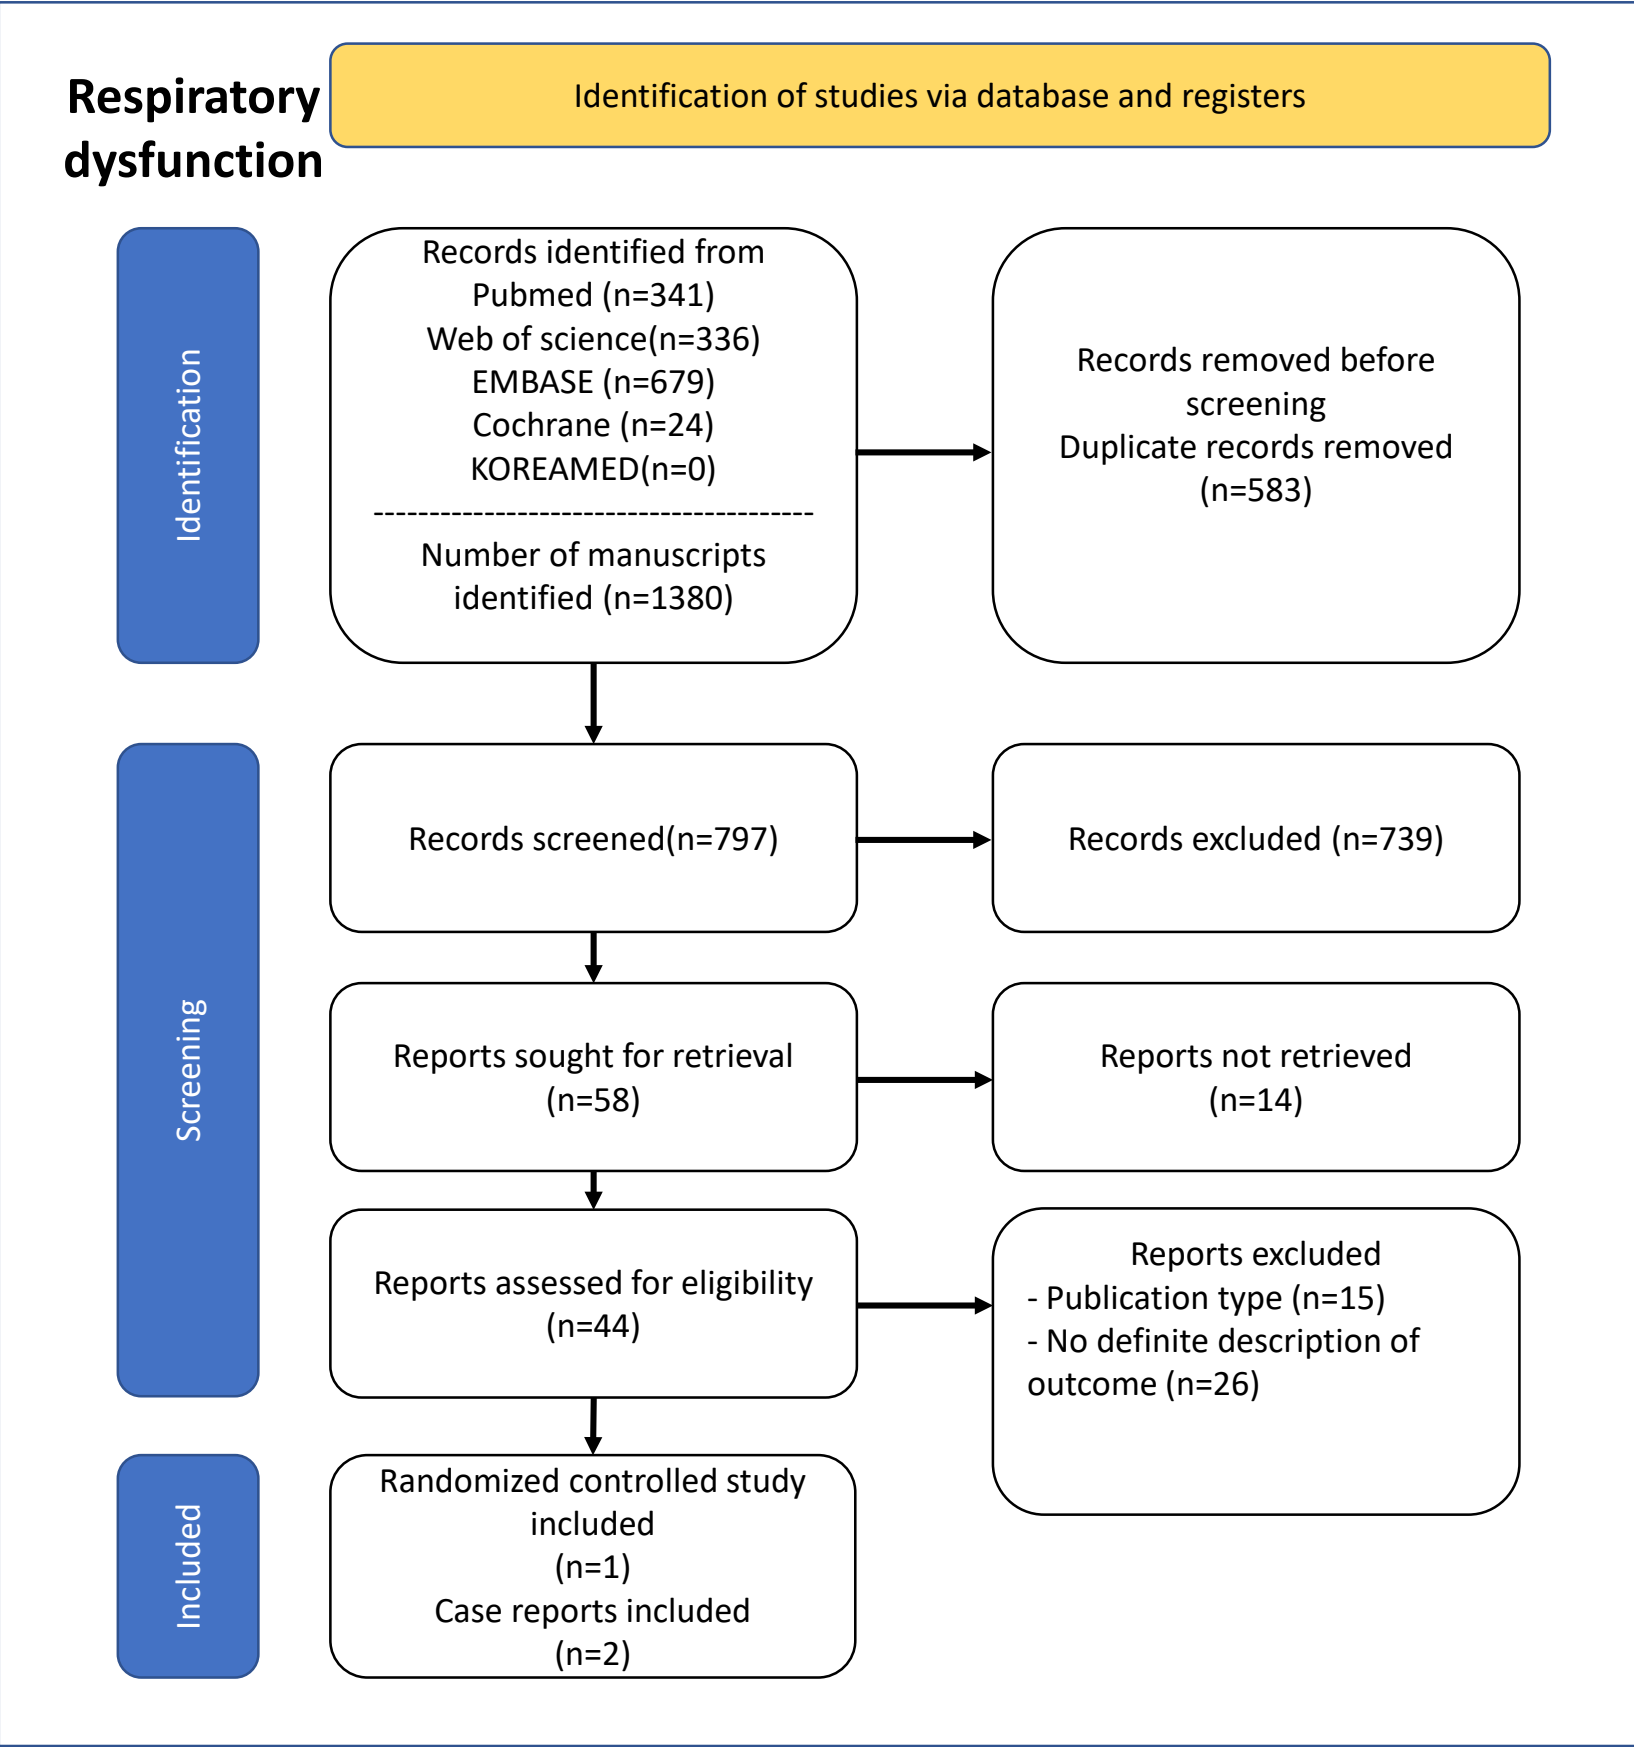

| Treatment                                                   | Class | Number of manuscript | Level       |
|-------------------------------------------------------------|-------|----------------------|-------------|
| home-based respiratory muscle training program              | II    | 1                    | C (benefit) |
| Exercise training (gym and home walking exercise programme) | IV    | 1                    | U           |
