# Supplementary material for: Evidence-Based Review on Symptomatic Management of Huntington’s Disease
Source: PubMed Central journal article supplement — J Mov Disord. 2024 Aug 9;17(4):369–86. doi: 10.14802/jmd.24140 (PMC11540544; doi:10.14802/jmd.24140), 2024-08-09
Supplement: jmd-24140-Supplementary-Fig-22.pdf [file jmd-24140-Supplementary-Fig-22.pdf]

## Supplementary Figure 22. PRISMA flow diagram of studies targeting weight loss in HD and drugs reviewed in this study

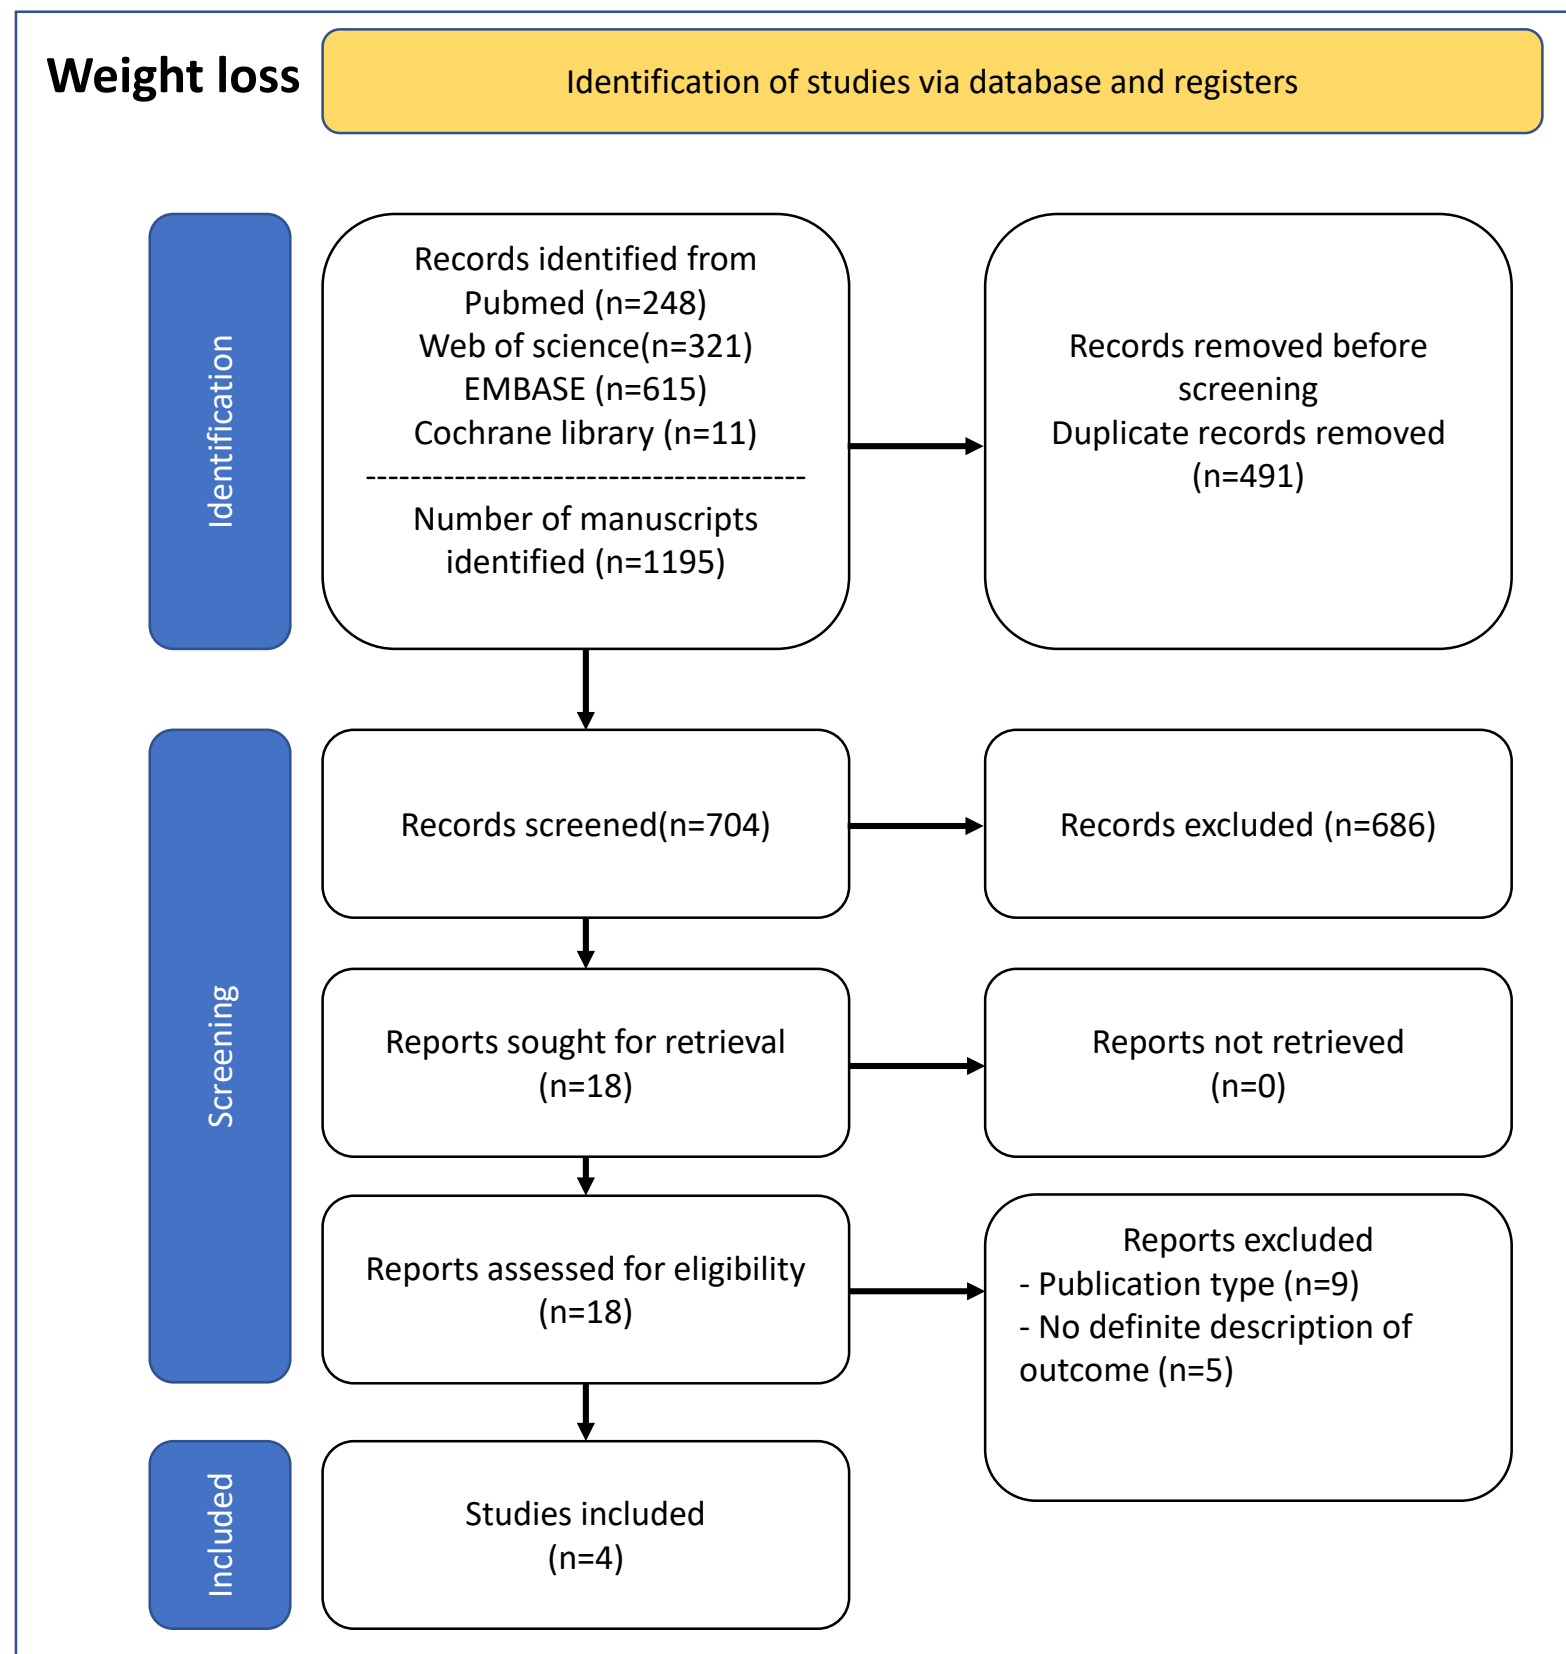

| Treatment              | Class | Number of manuscript | Level                |
|------------------------|-------|----------------------|----------------------|
| Nutritional support    | IV    | 1                    | U (no effect on BMI) |
| Rehabilitation         | IV    | 1                    | U (effective)        |
| Mesoridazine*          | IV    | 1                    | U (not effective)    |
| Multidisciplinary care | IV    | 1                    | U (effective)        |

\* This medication/intervention is not available in South Korea as of Jul. 2024
