# Supplementary material for: Evidence-Based Review on Symptomatic Management of Huntington’s Disease
Source: PubMed Central journal article supplement — J Mov Disord. 2024 Aug 9;17(4):369–86. doi: 10.14802/jmd.24140 (PMC11540544; doi:10.14802/jmd.24140), 2024-08-09
Supplement: jmd-24140-Supplementary-Fig-23.pdf [file jmd-24140-Supplementary-Fig-23.pdf]

**Supplementary Figure 23. PRISMA flow diagram of studies targeting dysphagia in HD and drugs reviewed in this study**

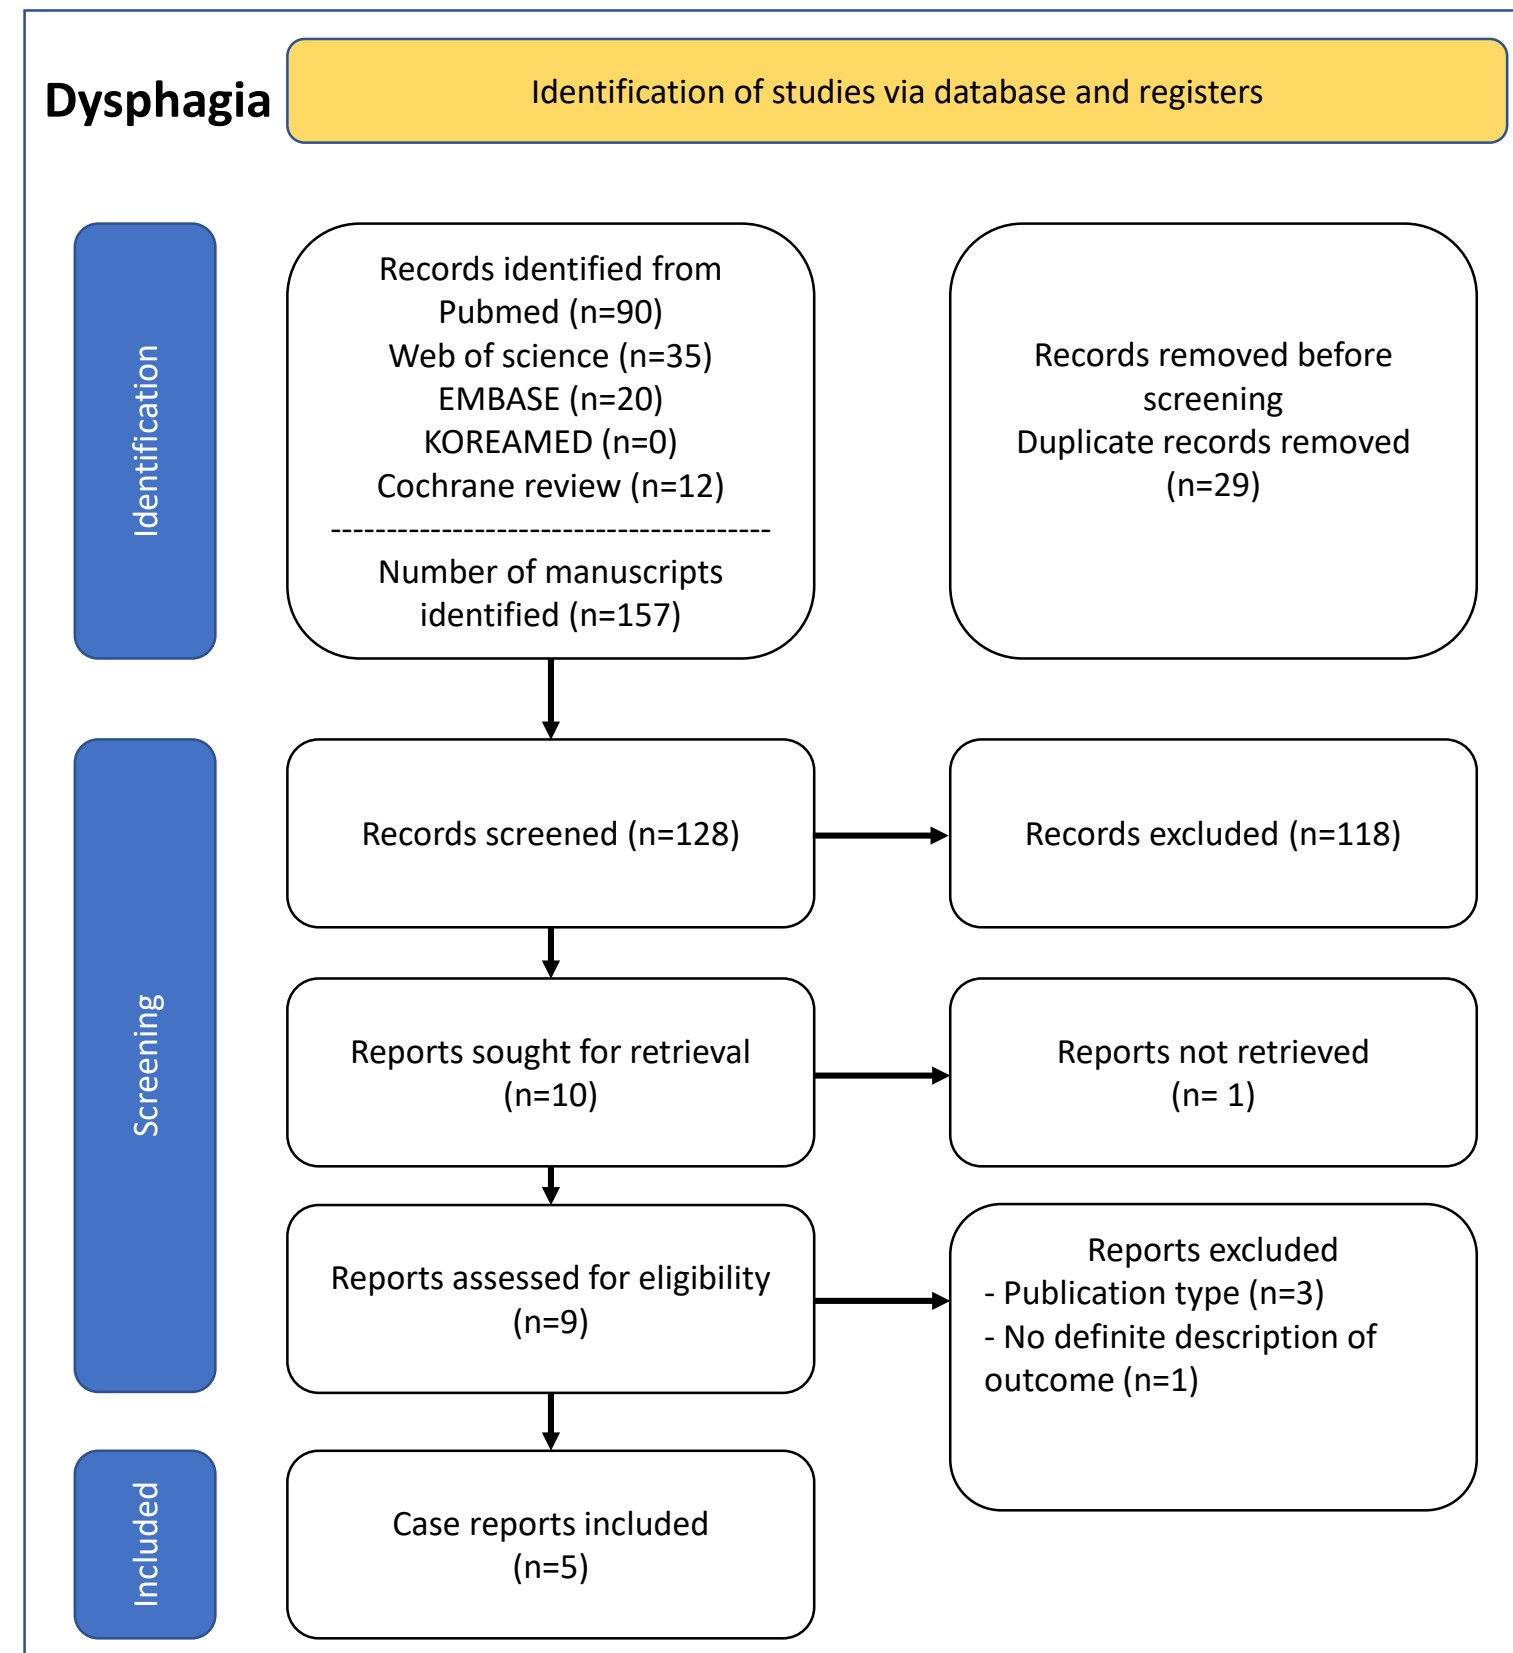

| Treatment                                                                                   | Class | Number of manuscript | Level |
|---------------------------------------------------------------------------------------------|-------|----------------------|-------|
| Olanzapine                                                                                  | IV    | 1                    | U     |
| Home based respiratory muscle training program                                              | III   | 1                    | U     |
| Meal time tip (nursing intervention)                                                        | IV    | 1                    | U     |
| Compensatory techniques (e.g., ten degree cervical and truncal flexion from erect position) | IV    | 1                    | U     |
| Home program of speech therapy                                                              | IV    | 1                    | U     |

\* All medications and interventions in the table is available in South Korea as of Jul. 2024
