# Supplementary figures and images for: Evidence-Based Review on Symptomatic Management of Huntington’s Disease
Source: PubMed Central journal article supplement — J Mov Disord. 2024 Aug 9;17(4):369–86. doi: 10.14802/jmd.24140 (PMC11540544; doi:10.14802/jmd.24140), 2024-08-09

## Supplementary Figure 21. PRISMA flow diagram of studies targeting pain in HD

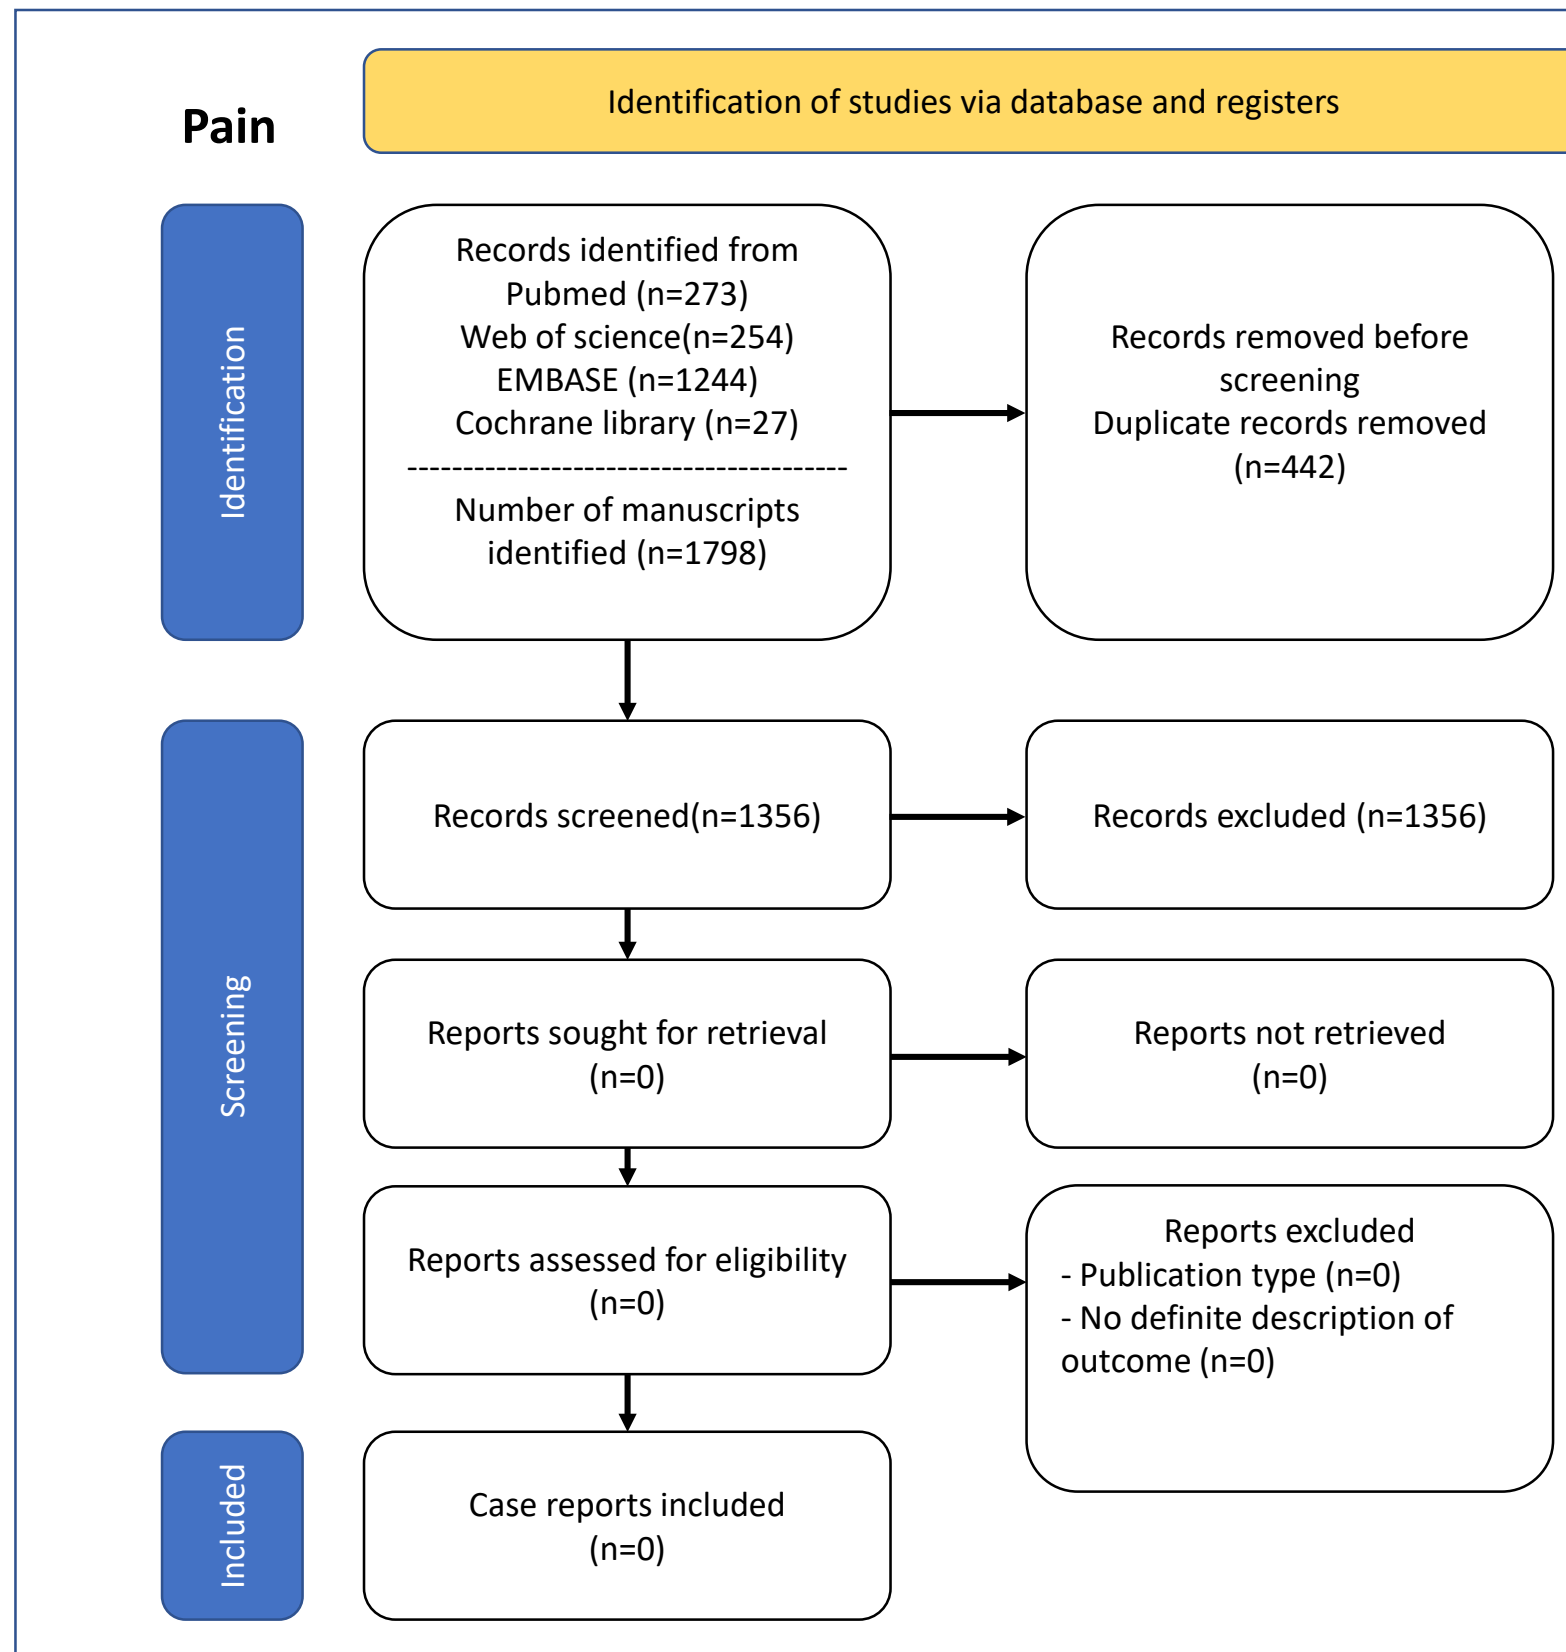

- Non identified

Supplement: jmd-24140-Supplementary-Fig-21.pdf [file jmd-24140-Supplementary-Fig-21.pdf]
